# Supplementary material
Source: MDPI journal article supplement (https://www.mdpi.com/1424-8247/14/9/917)
Supplement: s1 [file s1]

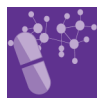

## Supplementary Materials

# Antifungal Activity of Extracts, Fractions, and Constituents from *Coccoloba cowellii* Leaves

Daniel Méndez <sup>1</sup>, Julio C. Escalona-Arranz <sup>2,\*</sup>, Enrique Molina Pérez <sup>1</sup>, Kenn Foubert <sup>3</sup>, An Matheeussen <sup>4</sup>, Emmy Tuenter <sup>3</sup>, Ann Cuypers <sup>5</sup>, Paul Cos <sup>4</sup> and Luc Pieters <sup>3,\*</sup>

- <sup>1</sup> Chemistry Department, Faculty of Applied Sciences, University of Camagüey, Carretera de Circunvalación Km 5½, Camagüey 74650, Cuba; daniel.mendez@reduc.edu.cu (D.M.); enrique.molina@reduc.edu.cu (E.M.P)
  - <sup>2</sup> Pharmacy Department, Faculty of Natural and Exact Sciences, Universidad de Oriente, Avenida Patricio Lumumba s/n, Santiago de Cuba 90500, Cuba
  - <sup>3</sup> Natural Products & Food Research and Analysis (NatuRA), Department of Pharmaceutical Sciences, University of Antwerp, Universiteitsplein 1, BE-2610 Antwerp, Belgium; kenn.foubert@uantwerpen.be (K.F.); emmy.tuenter@uantwerpen.be (E.T.)
  - <sup>4</sup> Laboratory of Microbiology, Parasitology and Hygiene (LMPH), Faculty of Pharmaceutical, Biomedical and Veterinary Sciences, University of Antwerp, Universiteitsplein 1, BE-2610 Antwerp, Belgium; an.matheeussen@uantwerpen.be (A.M.); paul.cos@uantwerpen.be (P.C.)
  - <sup>5</sup> Centre for Environmental Sciences, Campus Diepenbeek, Hasselt University, Agoralaan Building D, BE-3590 Diepenbeek, Belgium; ann.cuypers@uhasselt.be
- \* Correspondence: jcea@uo.edu.cu (J.C.E-A.); luc.pieters@uantwerpen.be (L.P.)

**Citation:** Méndez, D.; Escalona-Arranz, J.C.; Pérez, E.M.; Foubert, K.; Matheeussen, A.; Tuenter, E.; Cuypers, A.; Cos, P.; Pieters, L. Antifungal Activity of Extracts, Fractions, and Constituents from *Coccoloba cowellii* Leaves. *Pharmaceuticals* **2021**, *14*, 917. <https://doi.org/10.3390/ph14090917>

Academic Editors: Dejan Stojković and Marina Sokovic

Received: 23 August 2021

Accepted: 8 September 2021

Published: 10 September 2021

**Publisher's Note:** MDPI stays neutral with regard to jurisdictional claims in published maps and institutional affiliations.

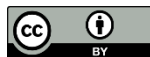

**Copyright:** © 2021 by the authors. Licensee MDPI, Basel, Switzerland. This article is an open access article distributed under the terms and conditions of the Creative Commons Attribution (CC BY) license (<http://creativecommons.org/licenses/by/4.0/>).

**Figure S1.** Full MS and MS/MS spectra of compounds 1-30.**(a)**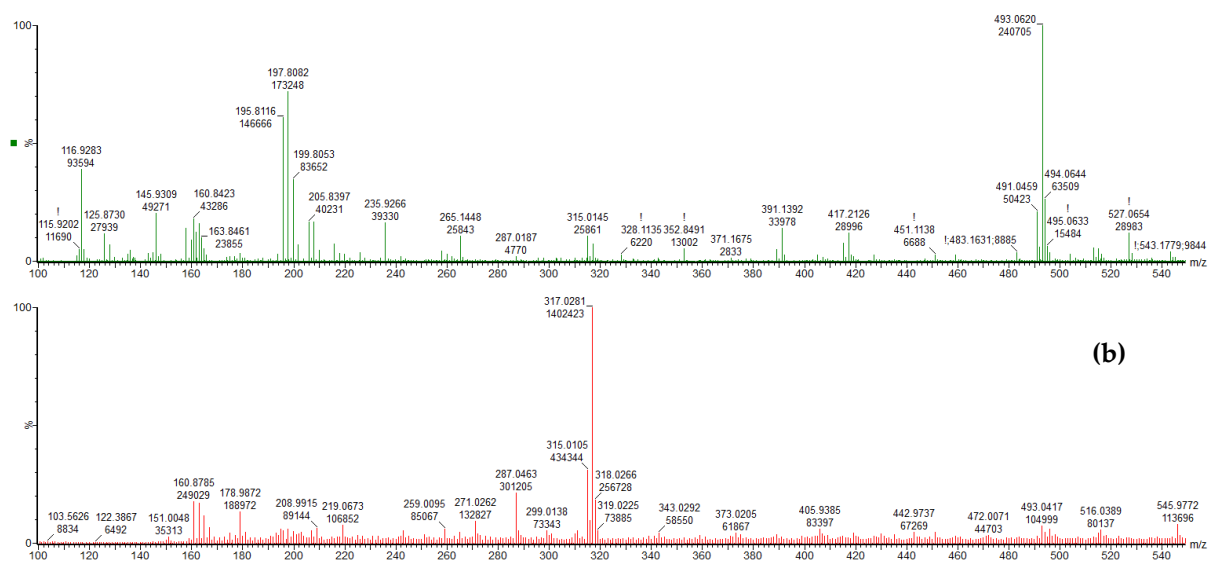**(b)**

Peak 1 [(a) MS spectrum and (b) MS/MS spectrum], Rt 10.39 min.

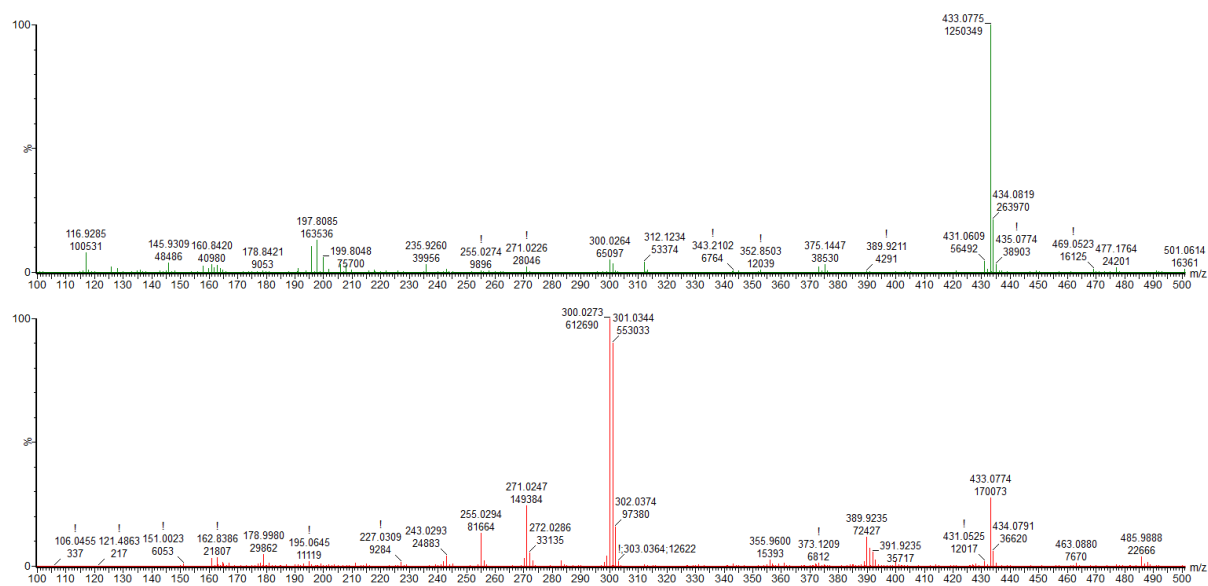**(a)****(b)**

Peak 2 [(a) MS spectrum and (b) MS/MS spectrum], Rt 12.33 min

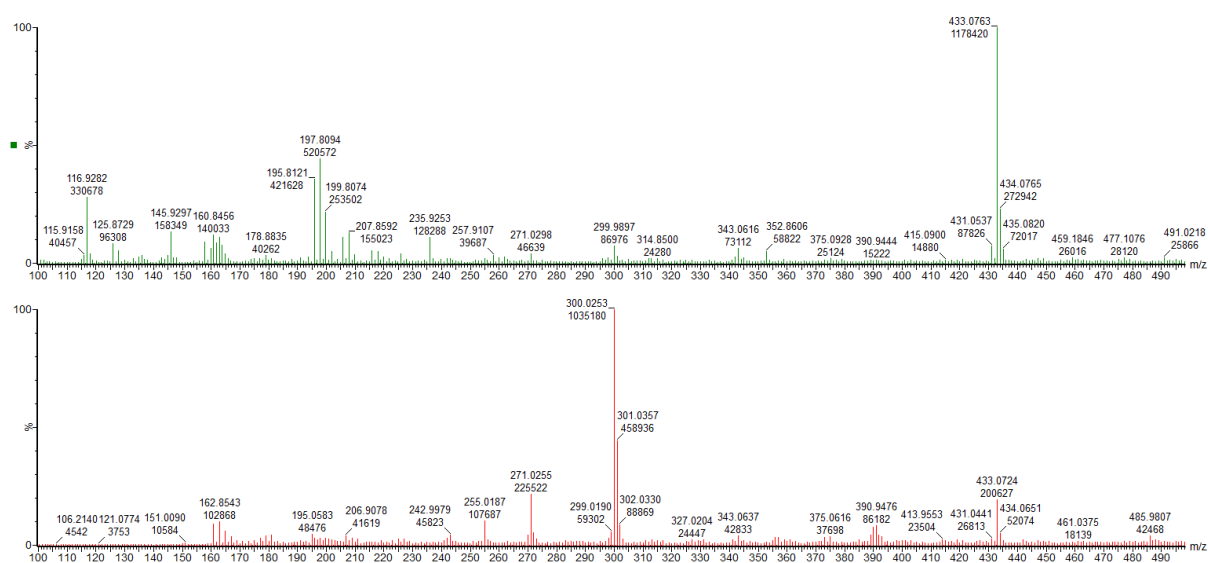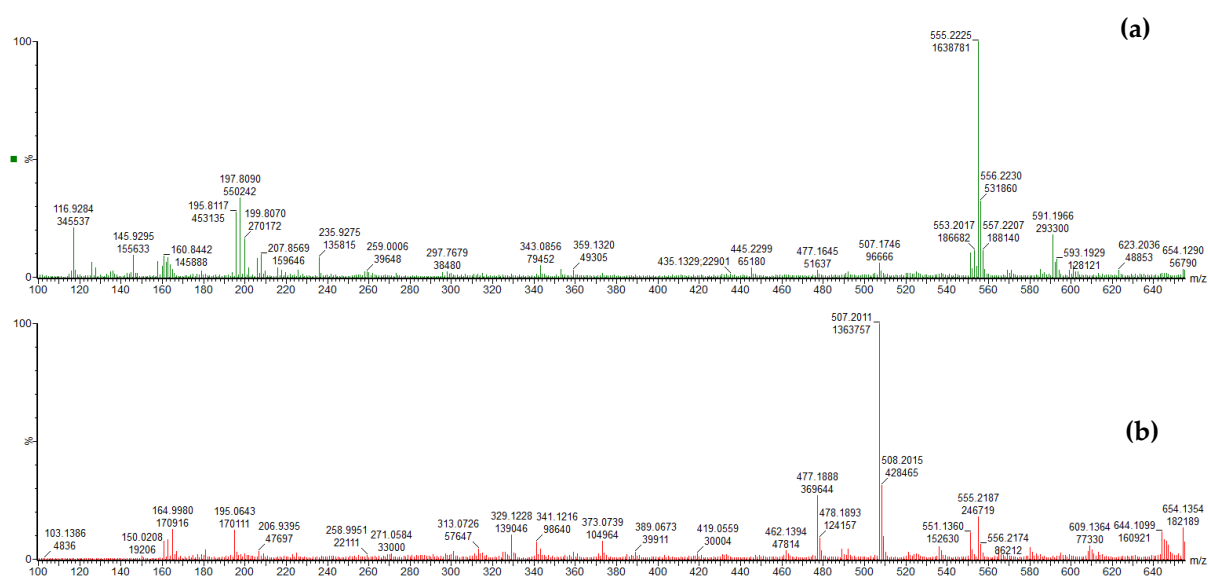

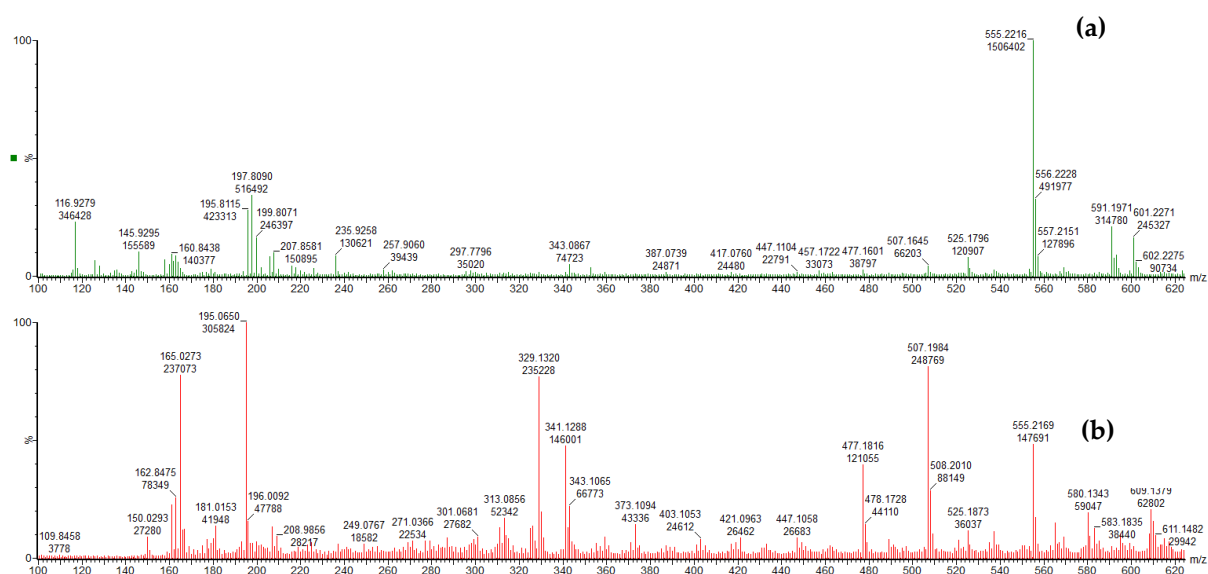

Peak 5 [(a) MS spectrum and (b) MS/MS spectrum], Rt 13.50 min

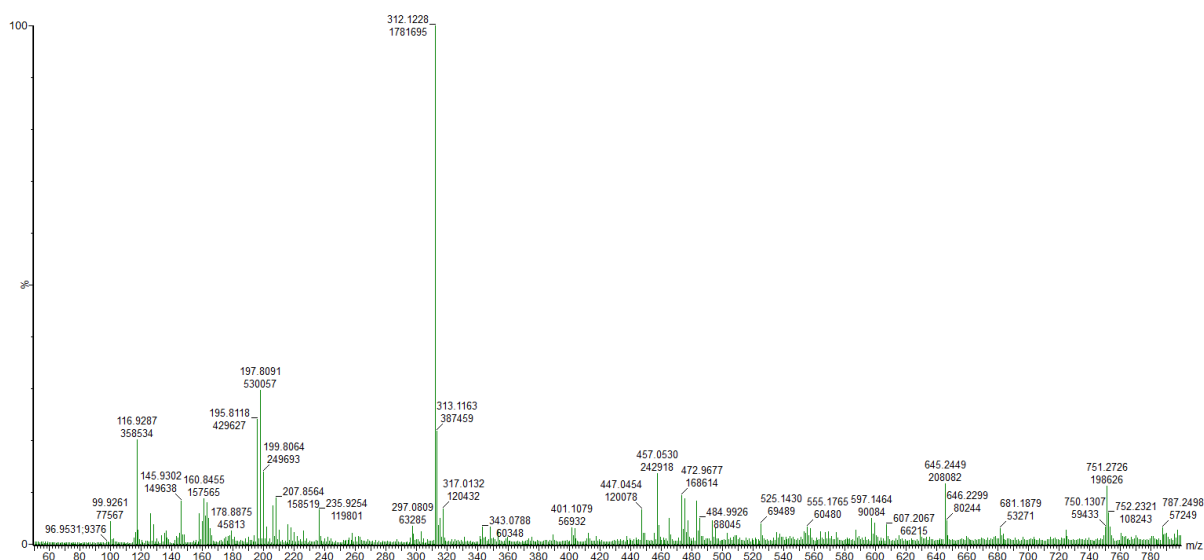

Peak 6 MS spectrum, Rt 13.85 min

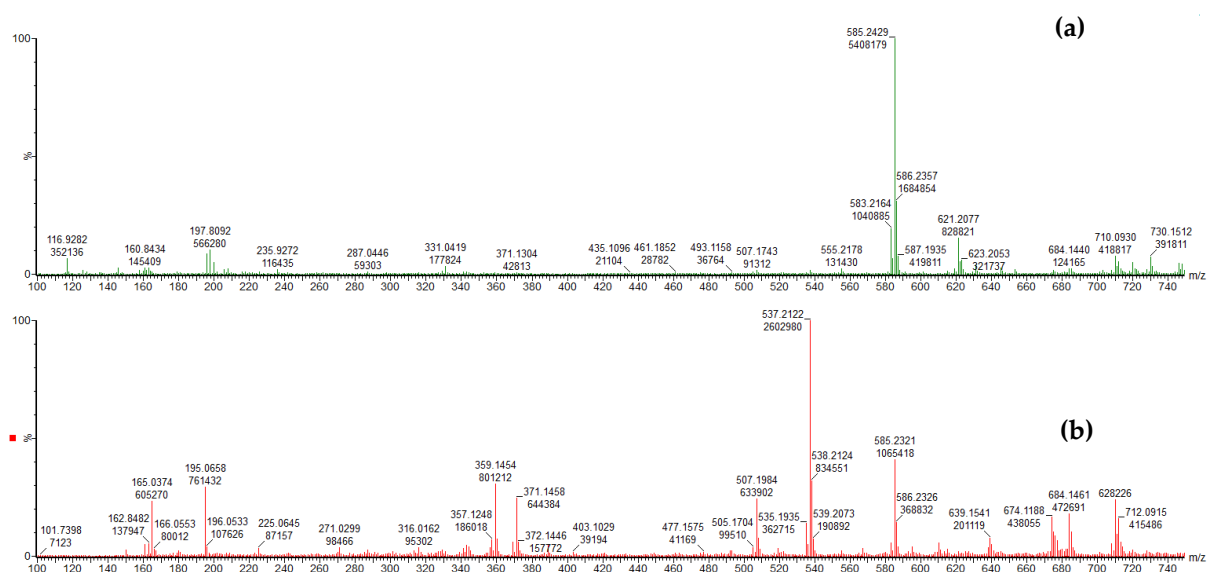

Peak 7 [(a) MS spectrum and (b) MS/MS spectrum], Rt 14.49 min

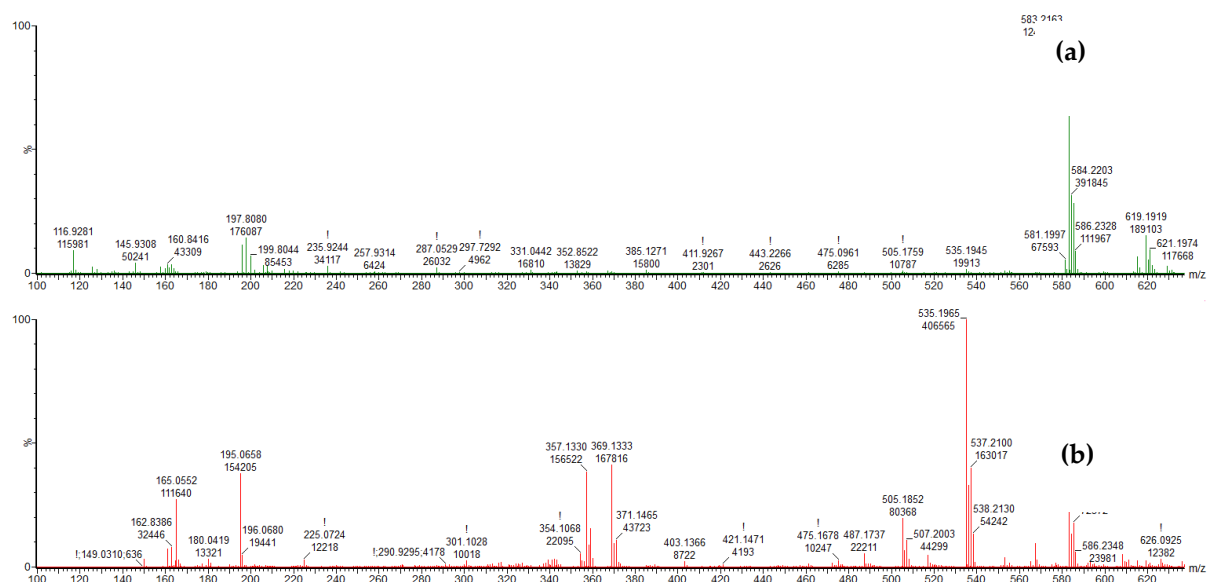

Peak 8 [(a) MS spectrum and (b) MS/MS spectrum], Rt 14.56 min

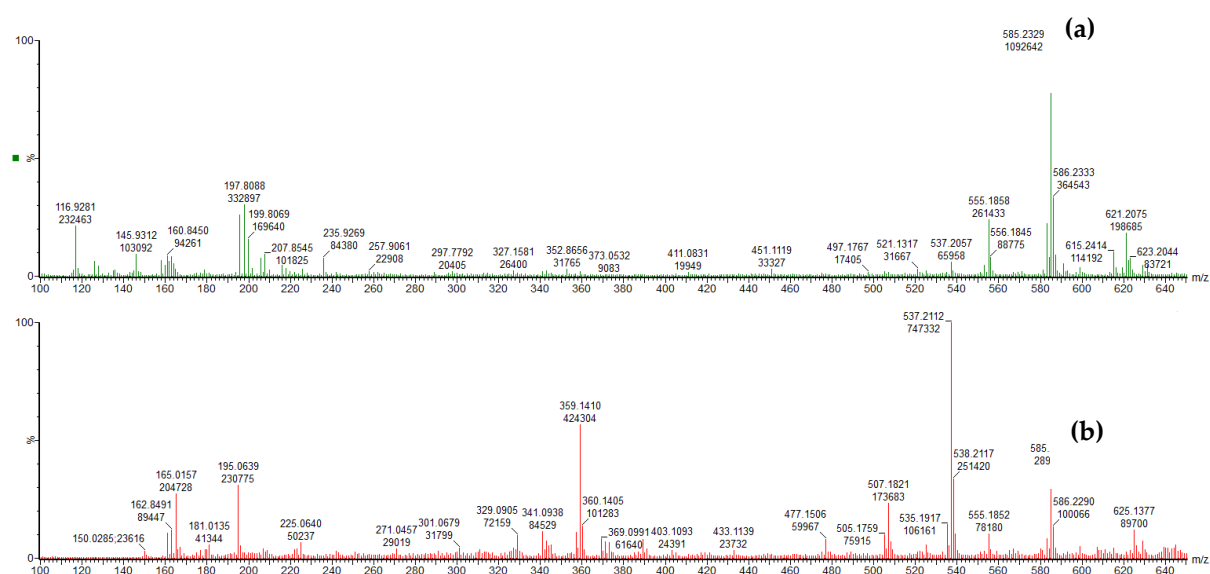

Peak 9 [(a) MS spectrum and (b) MS/MS spectrum], Rt 14.82 min

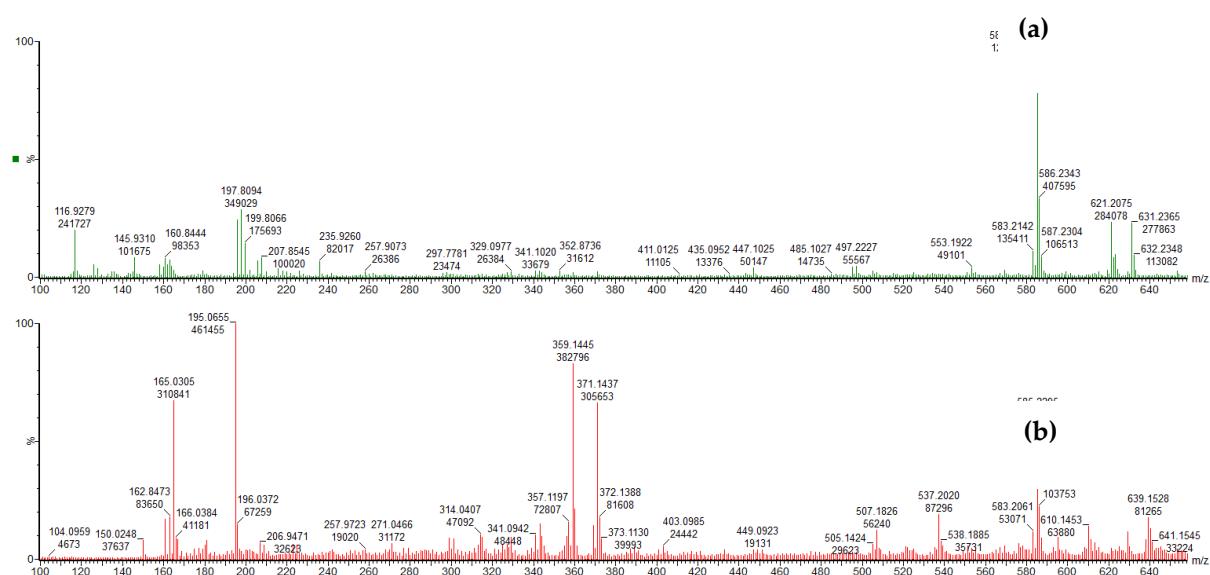

Peak 10 [(a) MS spectrum and (b) MS/MS spectrum], Rt 15.09 min

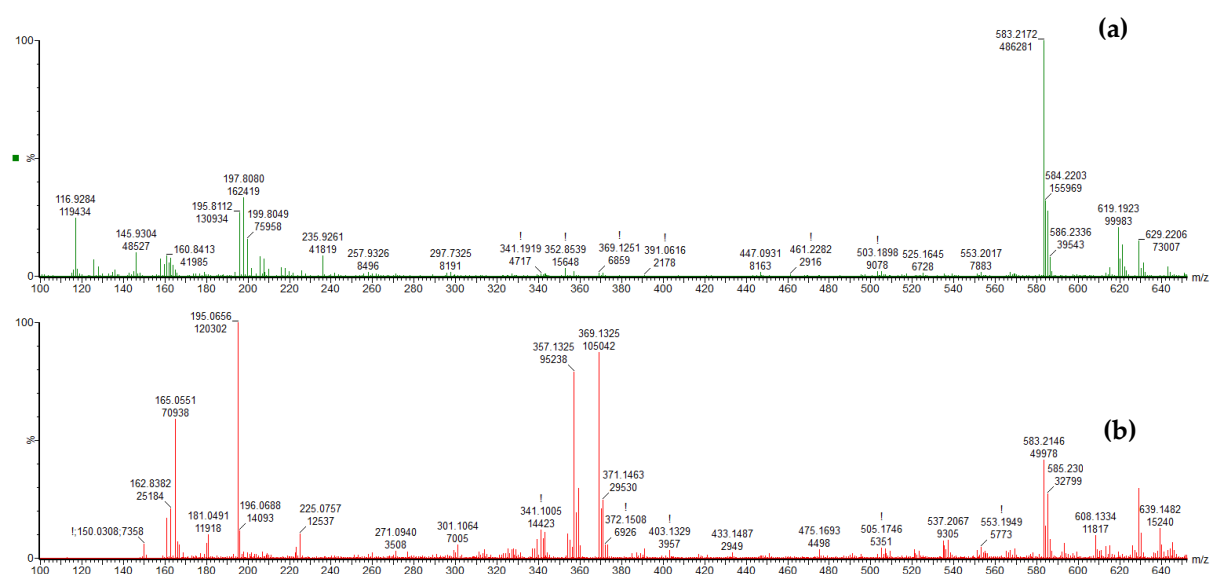

Peak 11 [(a) MS spectrum and (b) MS/MS spectrum], Rt 15.17 min

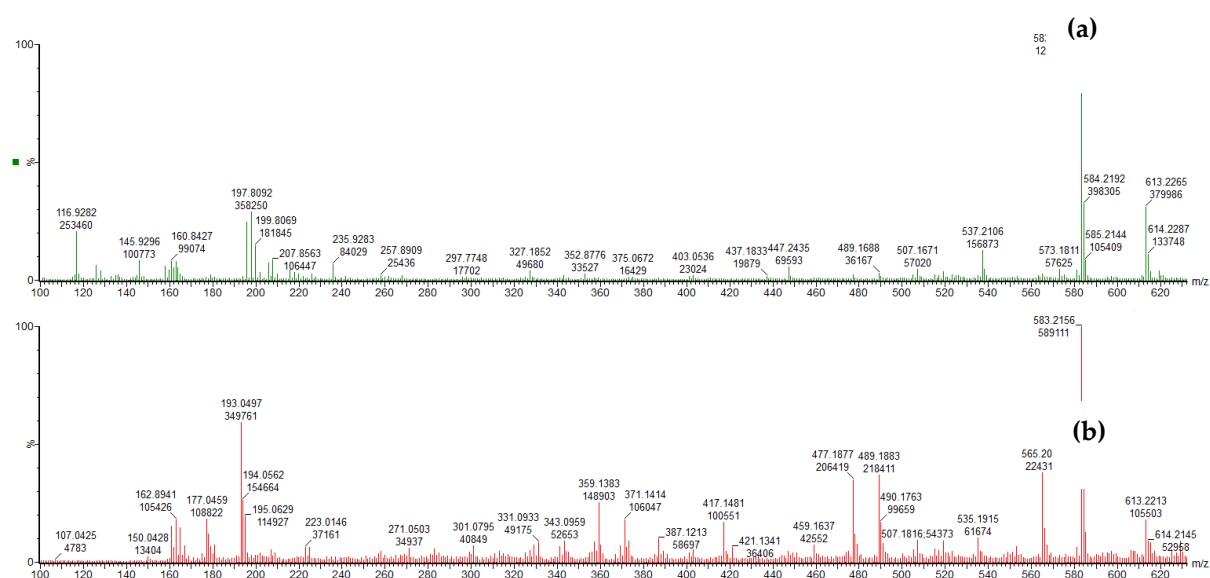

Peak 12 [(a) MS spectrum and (b) MS/MS spectrum], Rt 15.76 min

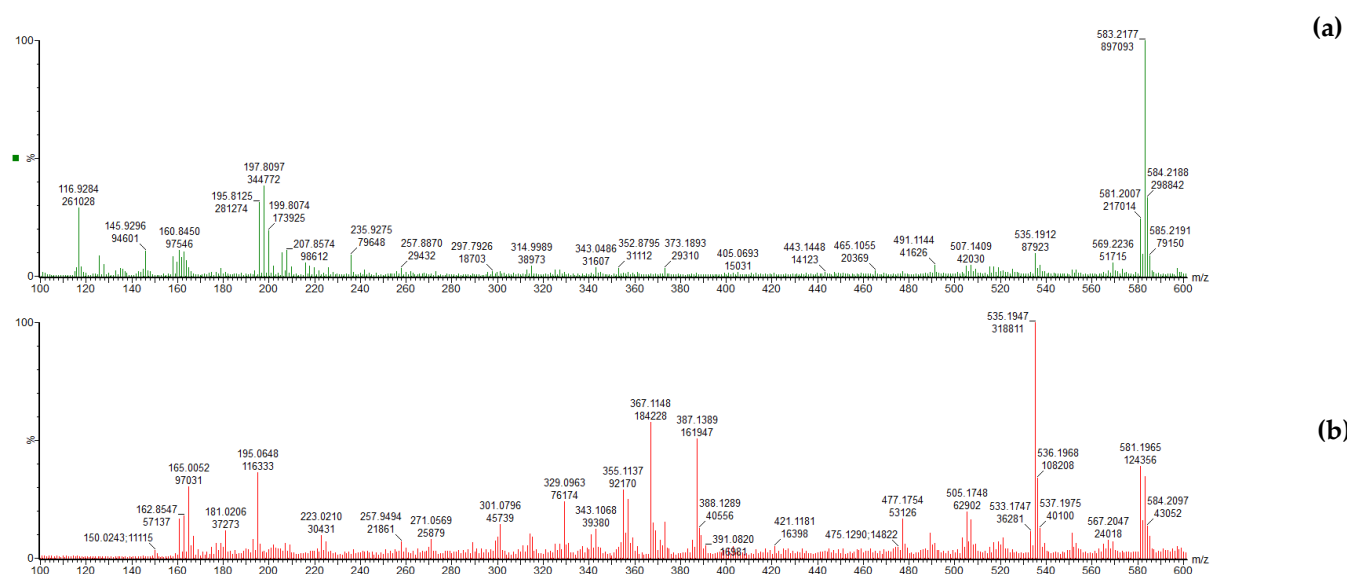

Peak 13 [(a) MS spectrum and (b) MS/MS spectrum], Rt 16.02 min

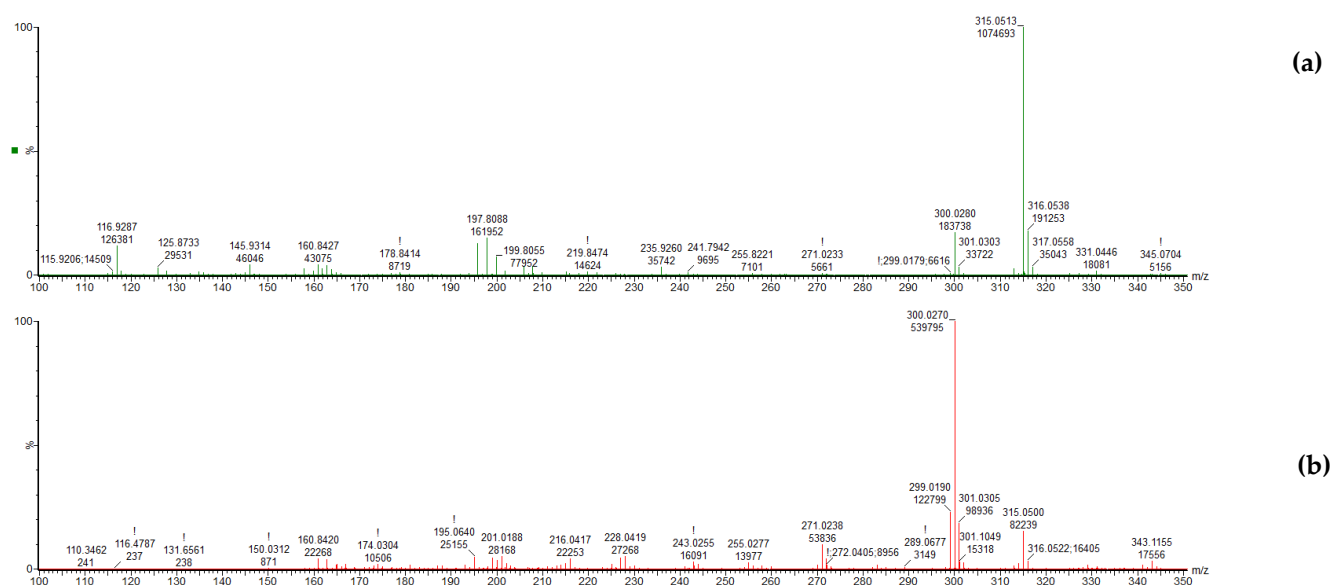

Peak 14 [(a) MS spectrum and (b) MS/MS spectrum], Rt 16.12 min



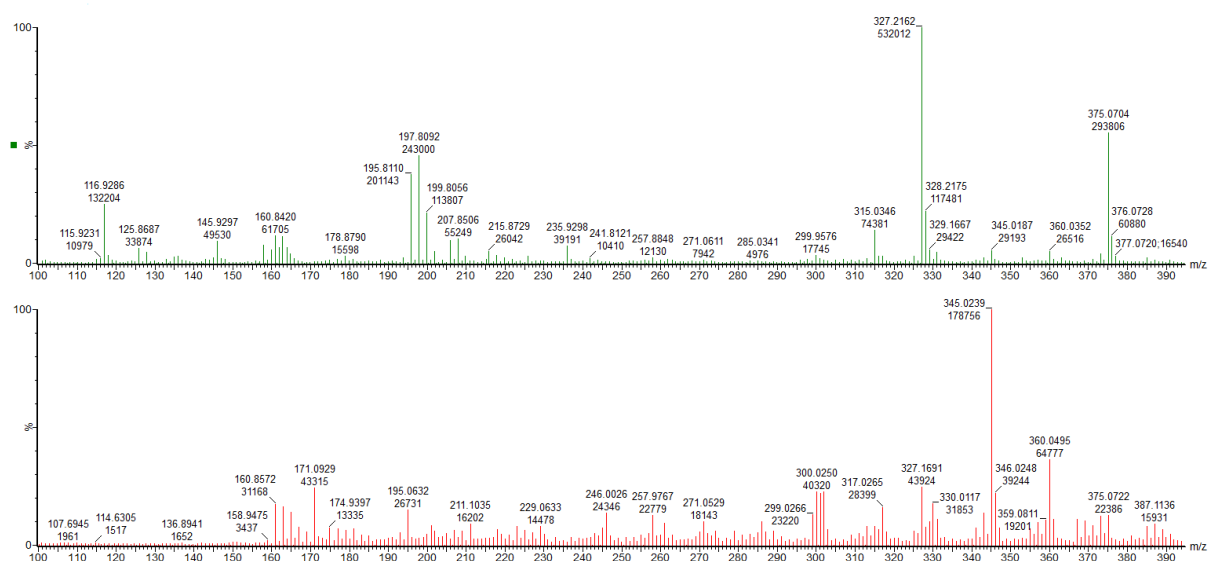

Peak 15 [(a) MS spectrum and (b) MS/MS spectrum], Rt 16.24 min

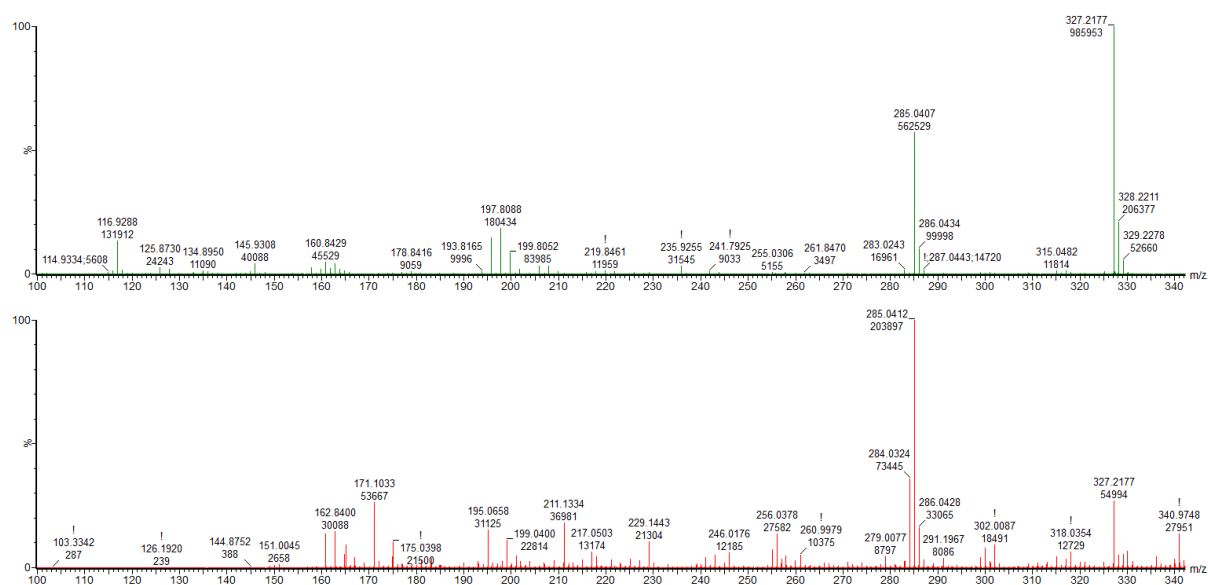

Peak 16 [(a) MS spectrum and (b) MS/MS spectrum], Rt 16.37 min

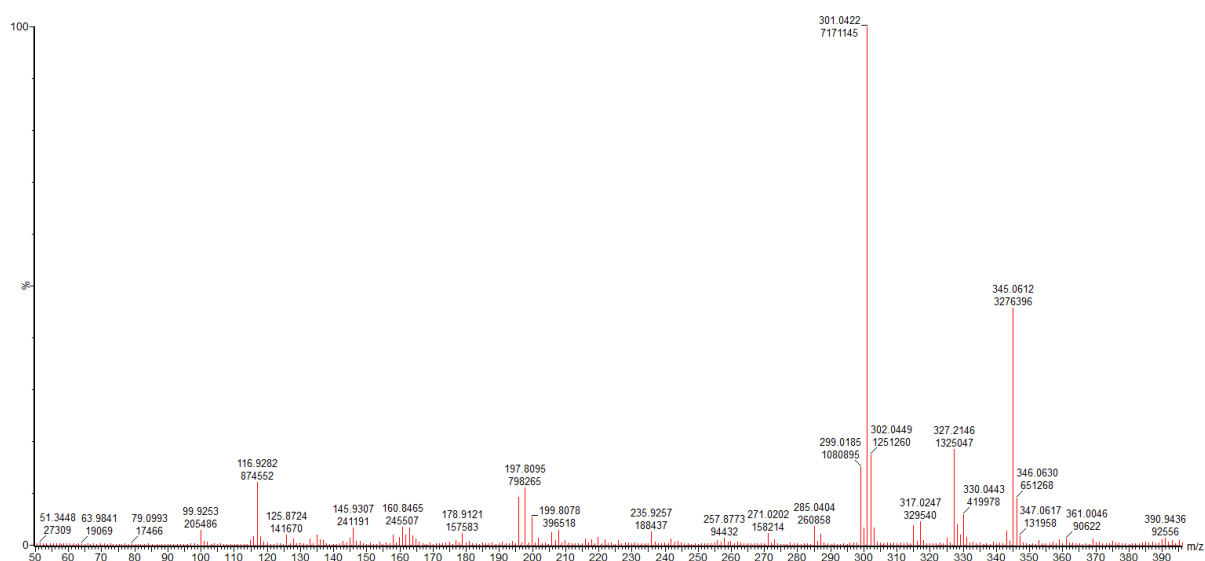

Peak 17 [(a) MS spectrum and (b) MS/MS spectrum], Rt 16.49 min

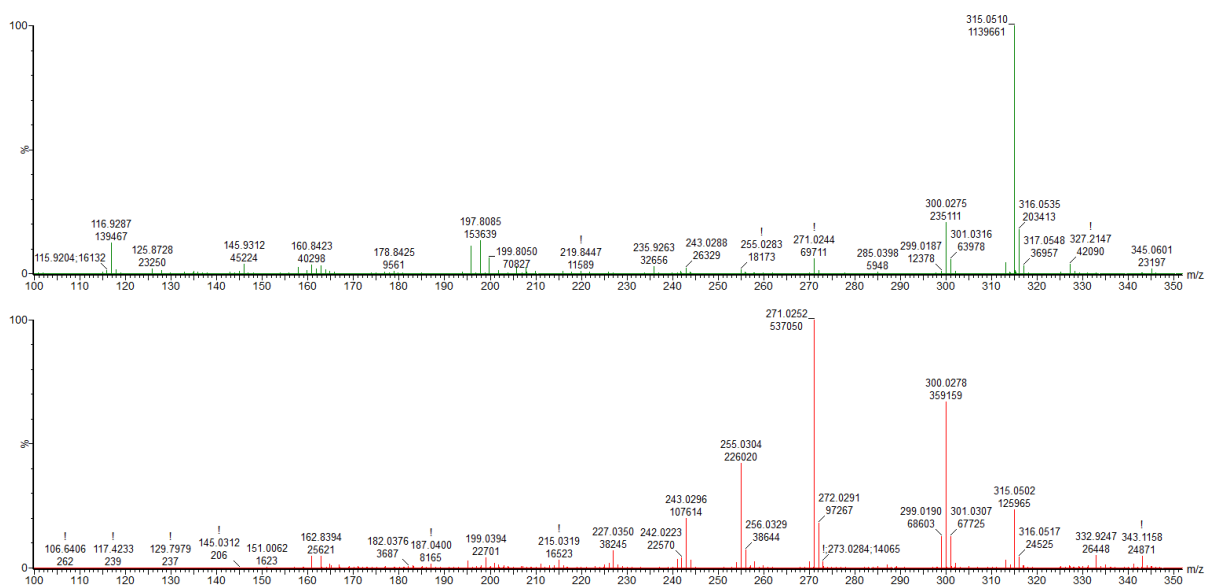

(a)

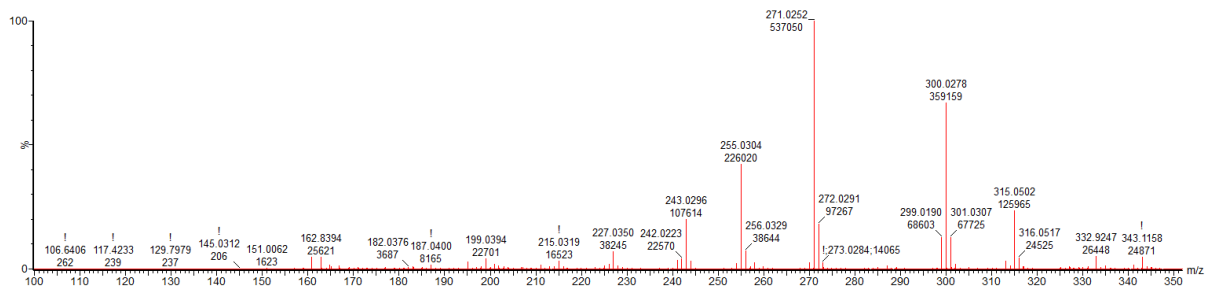

(b)

Peak 18 [(a) MS spectrum and (b) MS/MS spectrum], Rt 16.71 min

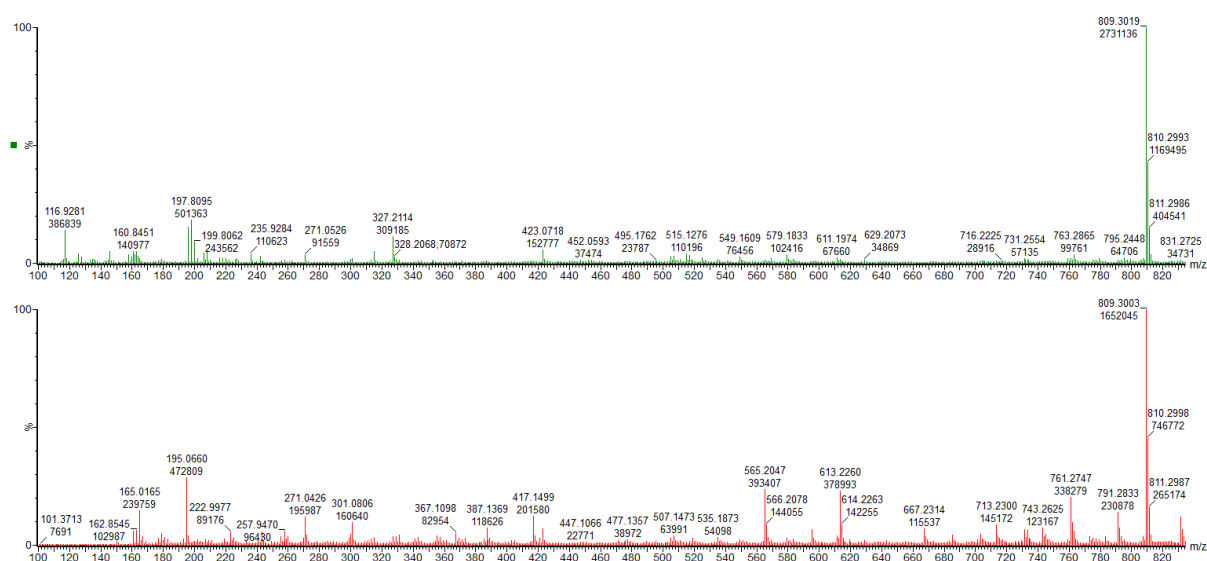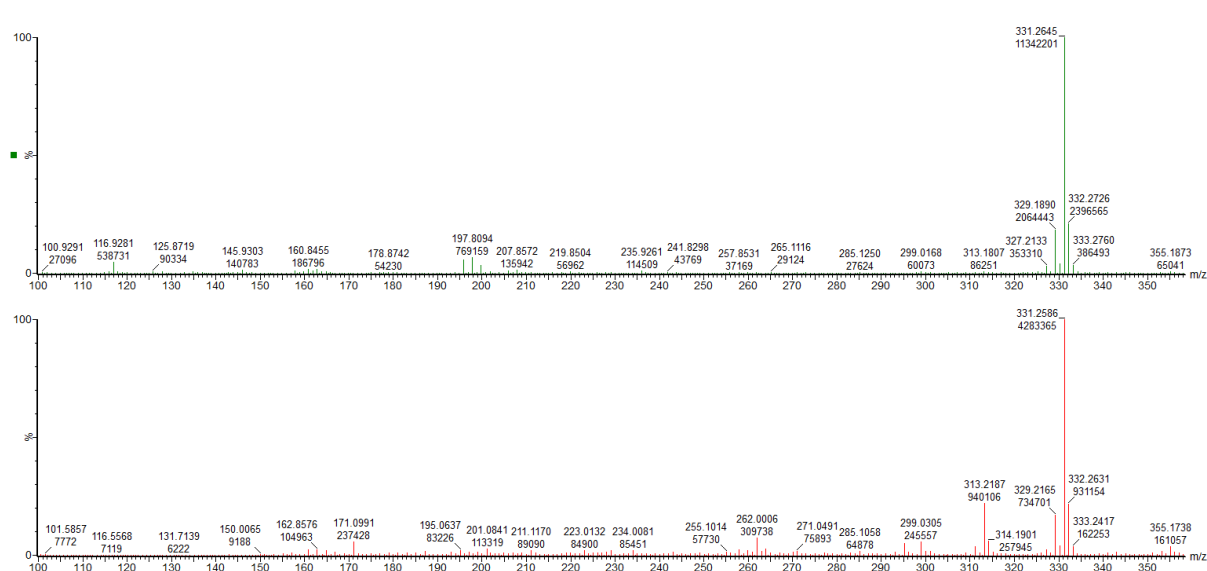

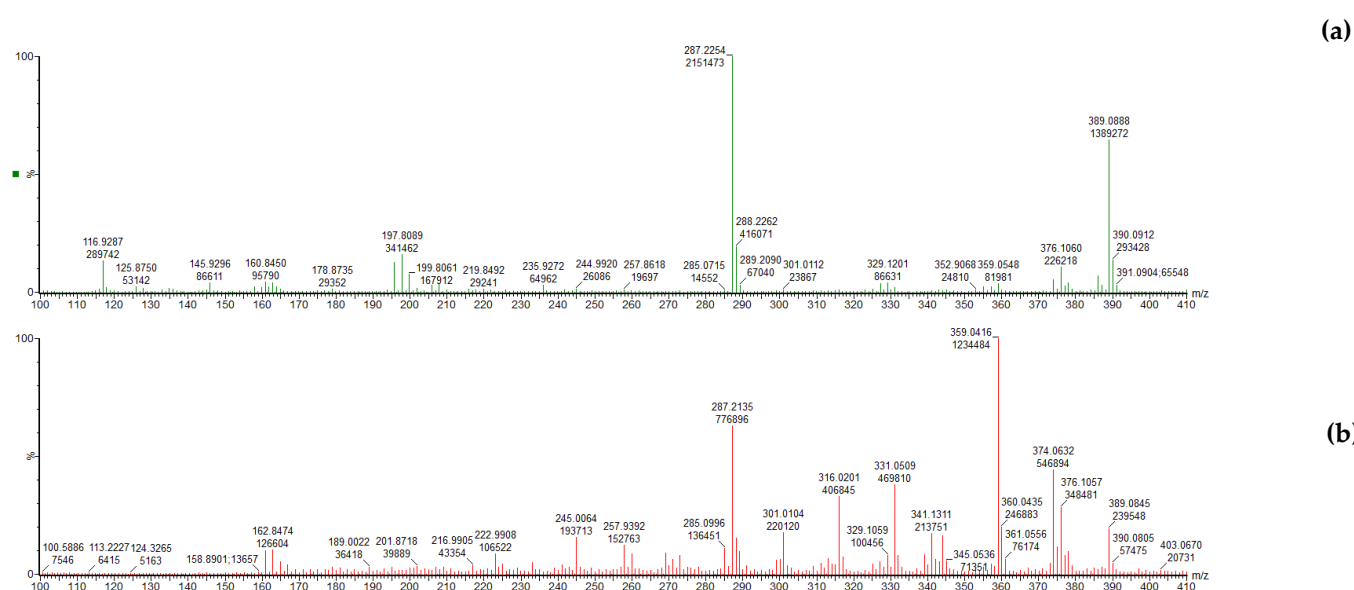

Peak 21 [(a) MS spectrum and (b) MS/MS spectrum], Rt 17.73 min

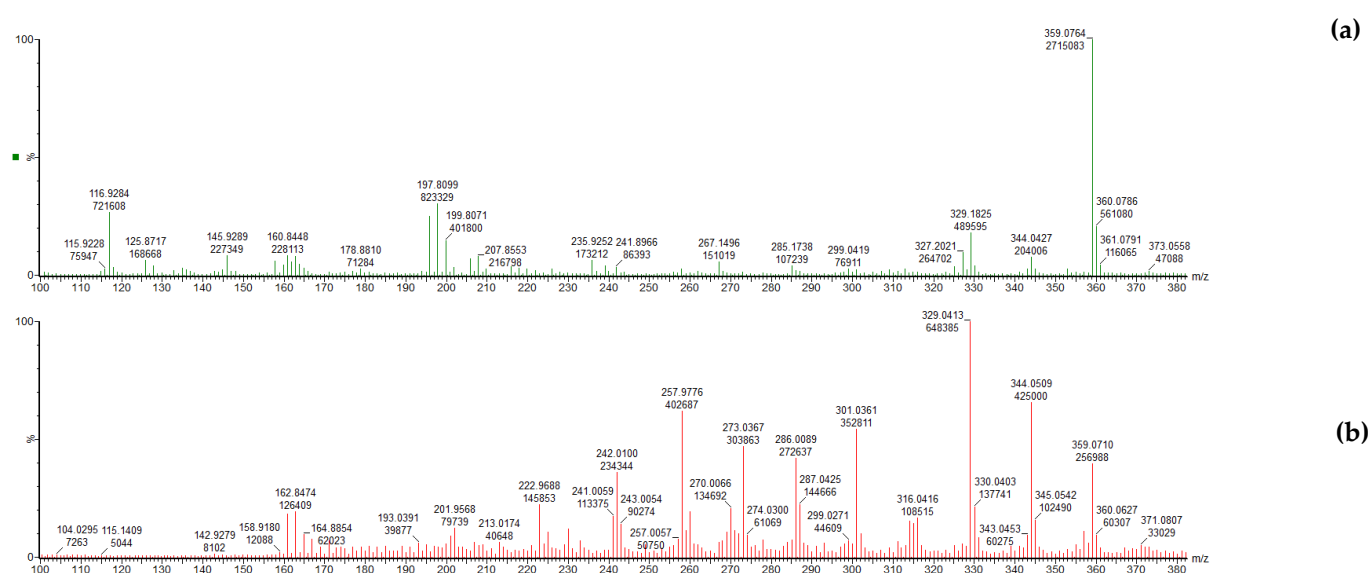

Peak 22 [(a) MS spectrum and (b) MS/MS spectrum], Rt 17.99 min

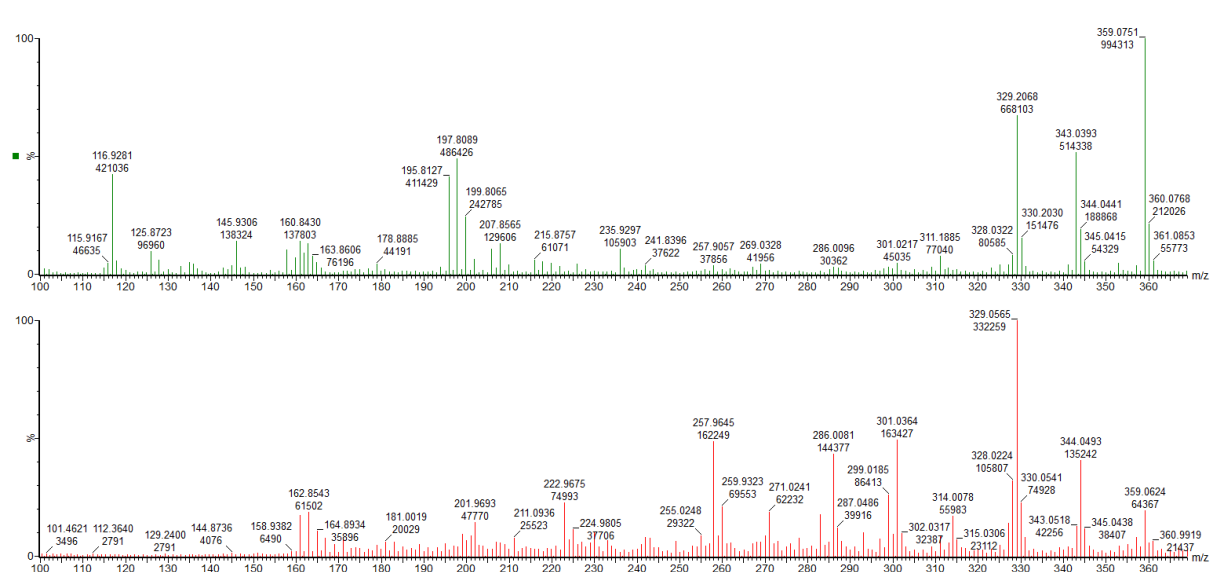

Peak 23 [(a) MS spectrum and (b) MS/MS spectrum], Rt 18.13 min

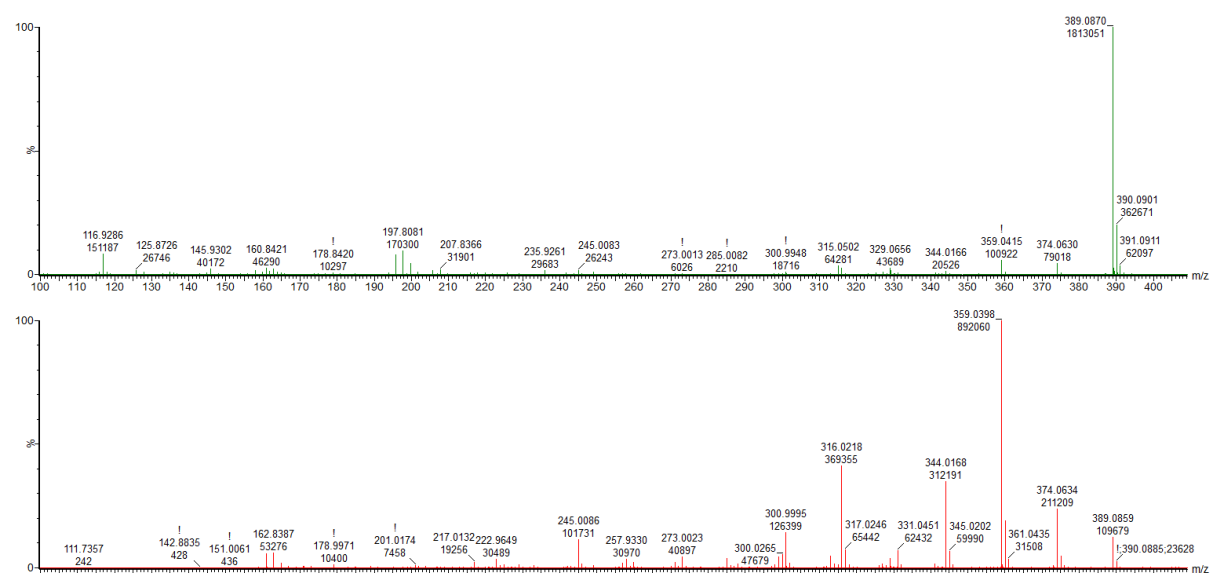

Peak 24 [(a) MS spectrum and (b) MS/MS spectrum], Rt 18.25 min

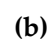

Peak 26 [(a) MS spectrum and (b) MS/MS spectrum], Rt 19.58 min.

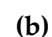

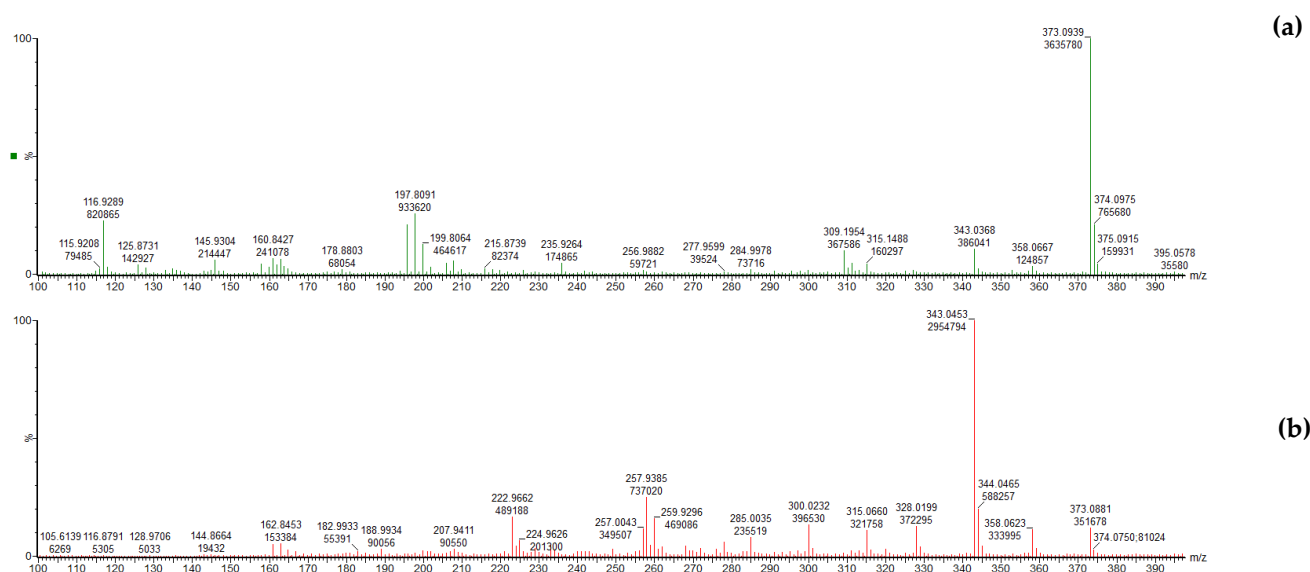

Peak 27 [(a) MS spectrum and (b) MS/MS spectrum], Rt 19.83 min

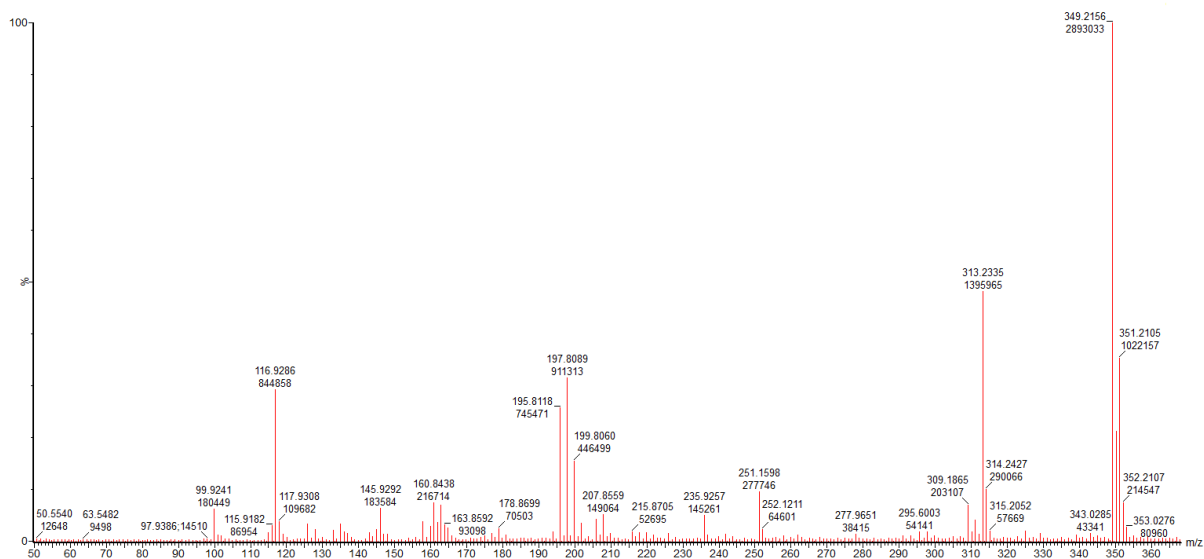

Peak 28 MS spectrum, Rt 20.18 min

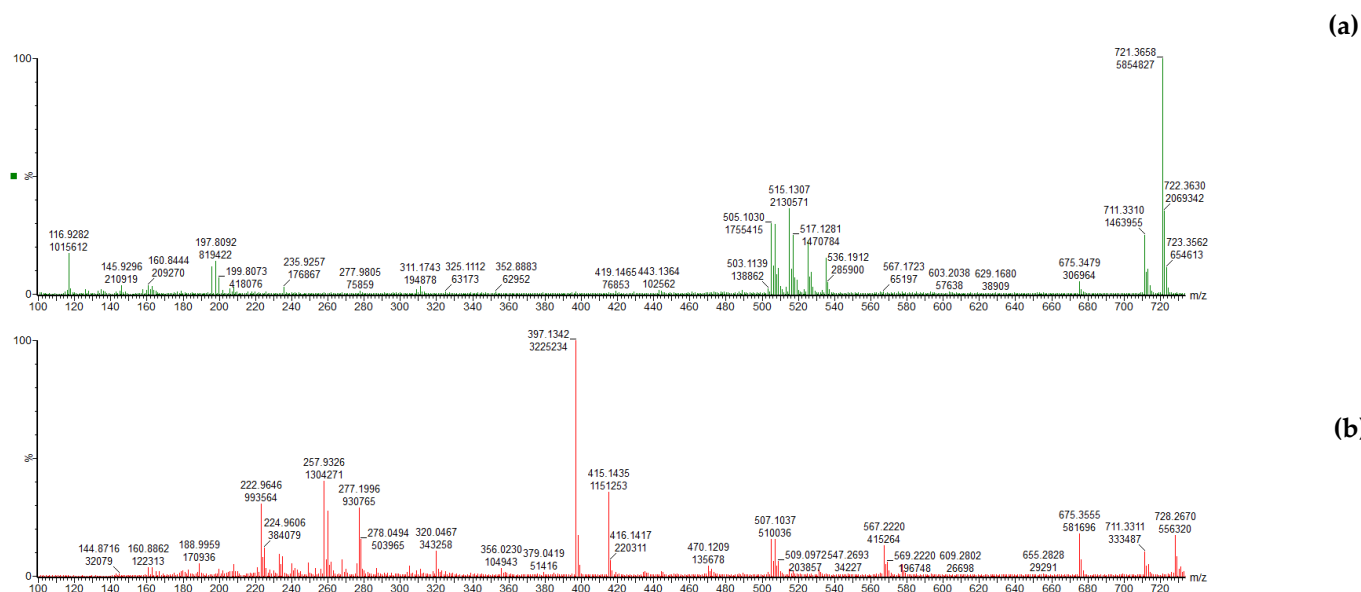

Peak 29 [(a) MS spectrum and (b) MS/MS spectrum], Rt 21.03 min

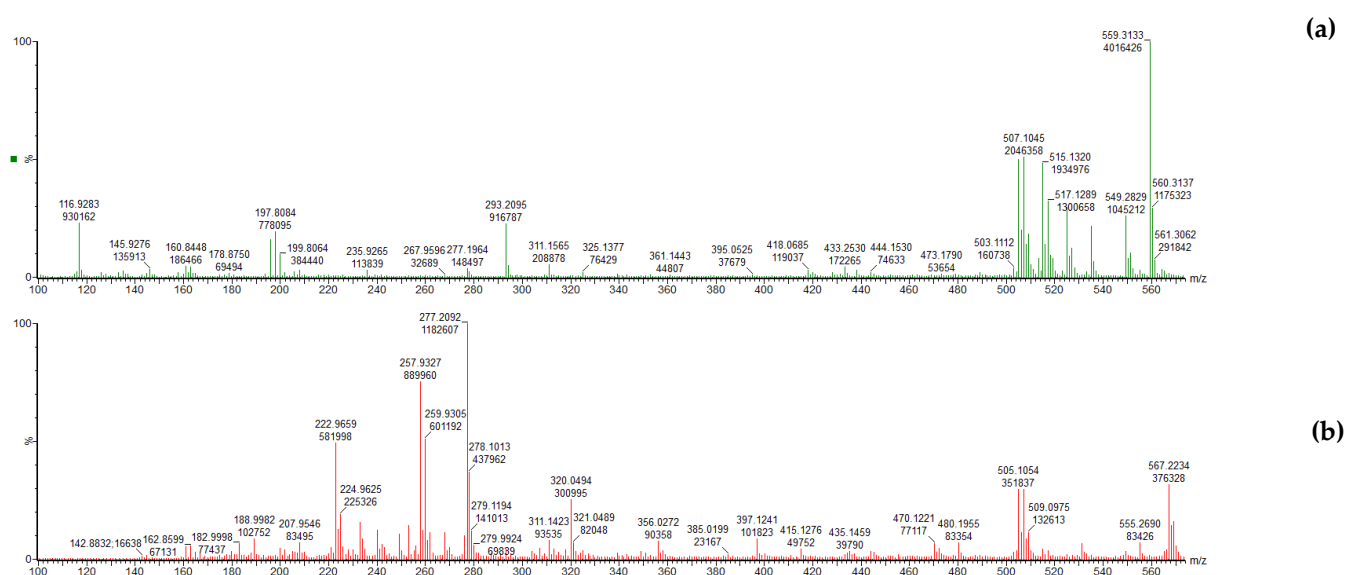

Peak 30 [(a) MS spectrum and (b) MS/MS spectrum], Rt 22.15 min



**Figure S2.** Tentative fragmentation pathways of some compounds present in the of the methanol 90% fraction of the total extract of *C. cowellii*.

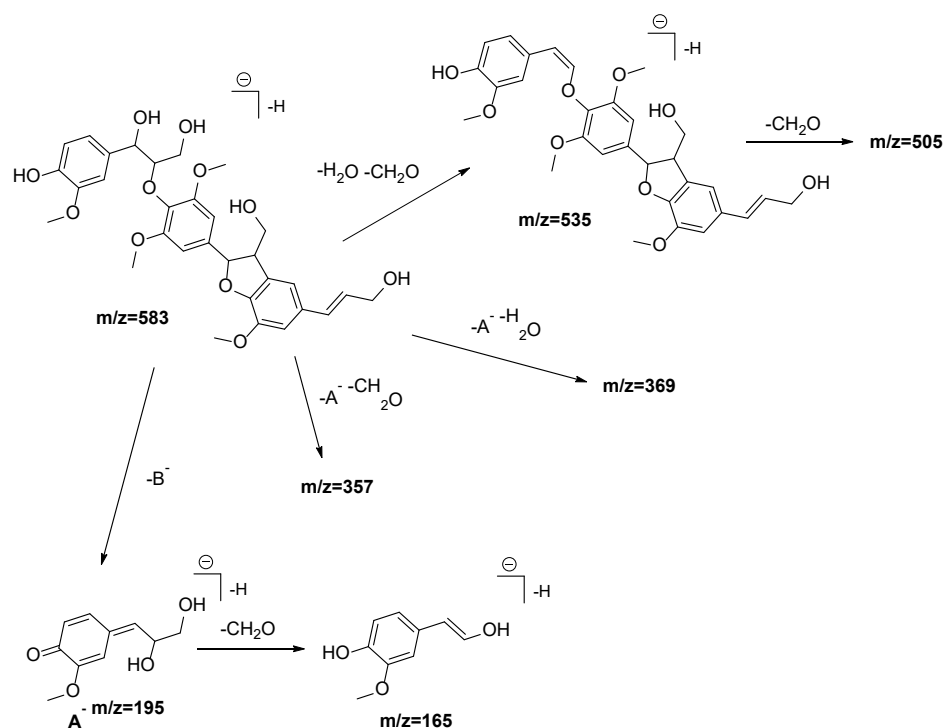

Peak 8, Rt 14.56 min, tentative identification: Trilignol type G(8-O-4)X(8-5)X (being X=either S or G). The represented formula is only for illustrative purpose. Hypothetical fragmentation pattern taken from Morreel et al. [1,2].

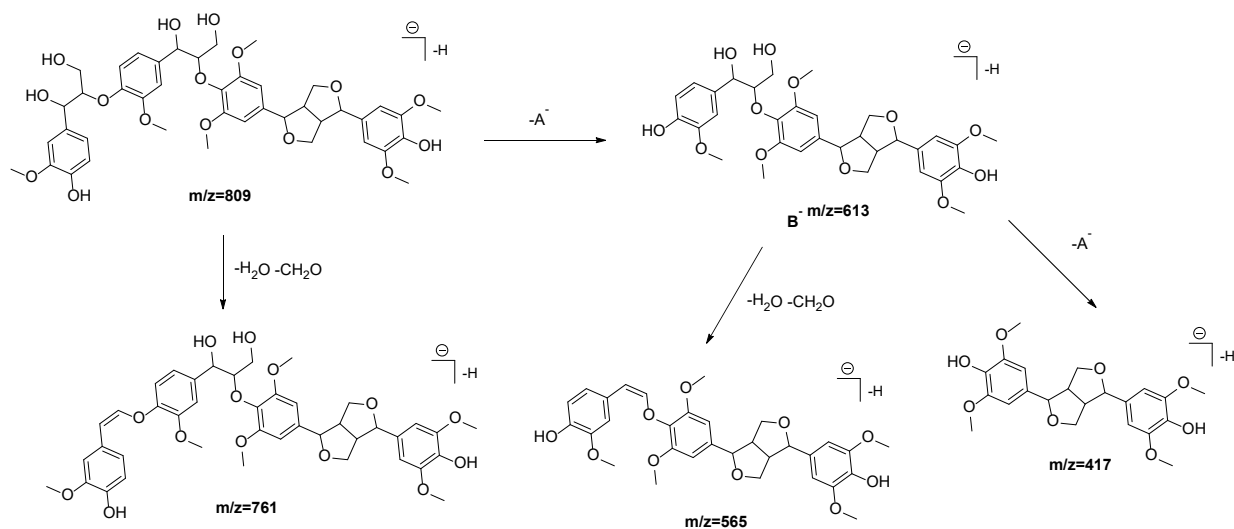

Peak 19, Rt 16.85 min, tentative identification: Tetralignol type G(8-O-4)G(8-O-4)S(8-8)S. The represented formula is only for illustrative purpose. Hypothetical fragmentation pattern taken from Morreel et al. [1,2].

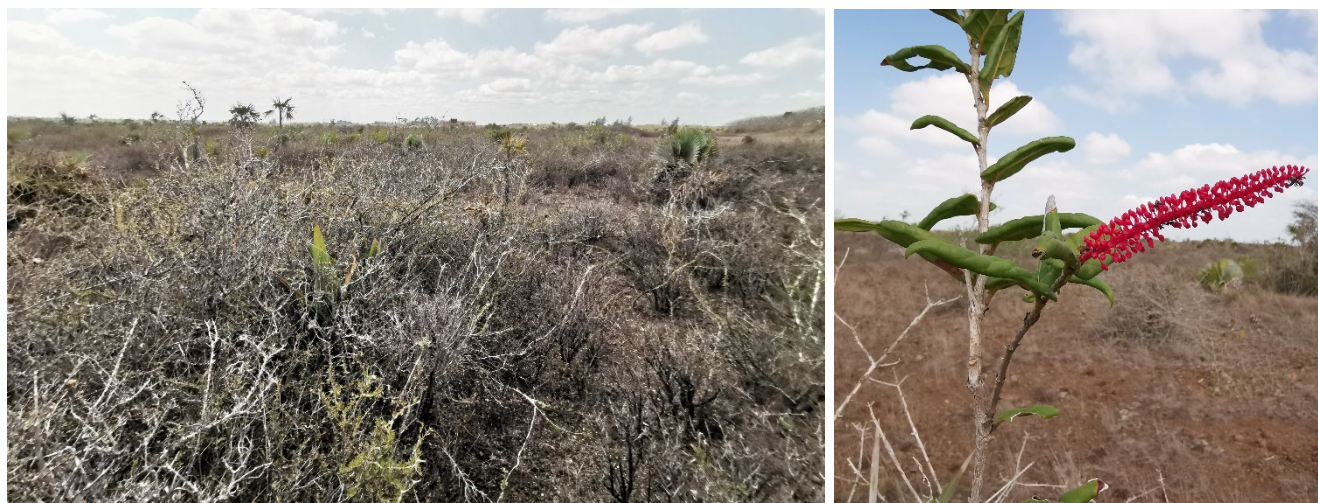

**Figure S3.** Growth environment (municipality of Camagüey, Cuba) and flowering branch of *C. cowellii*.

**Figure S4.** NMR data of mixture **M-6A** (compound **I** and unidentified impurity).

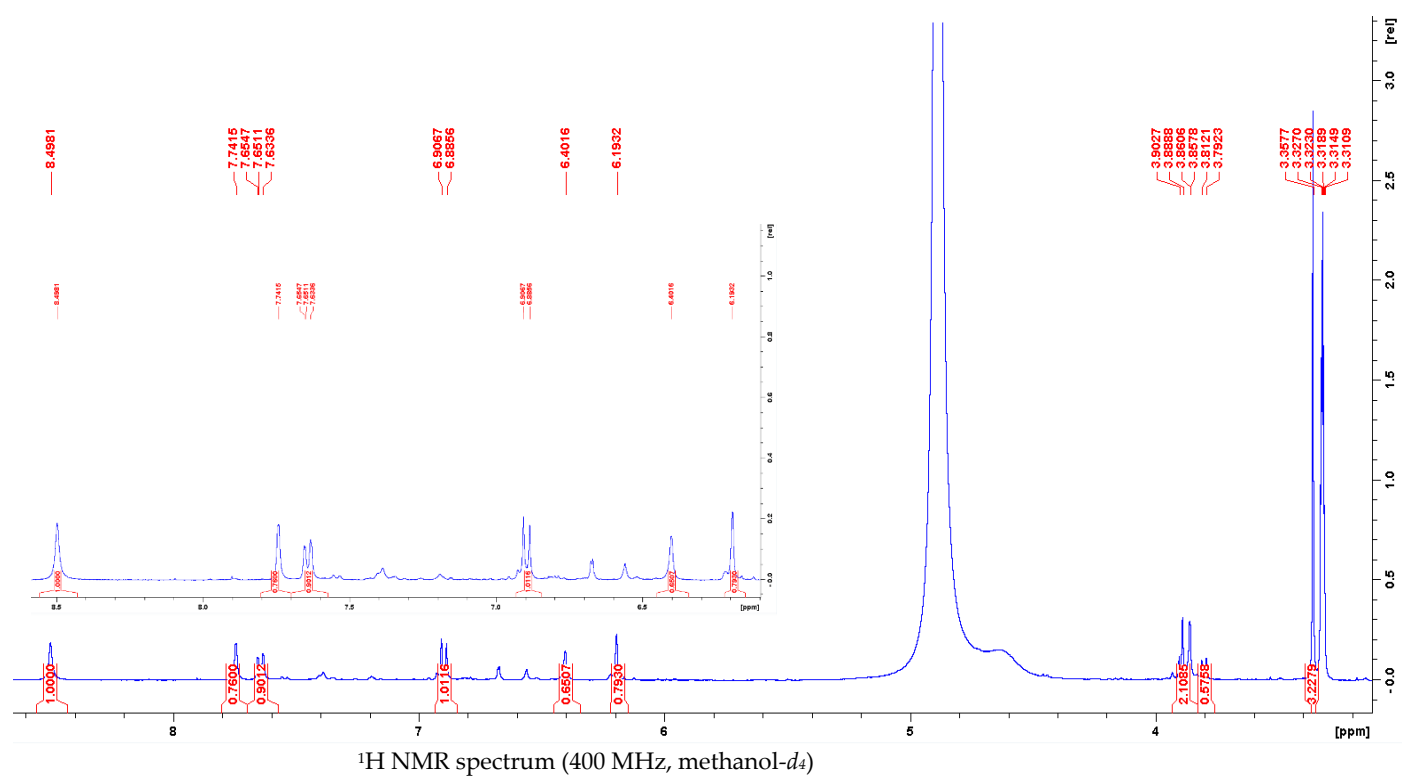

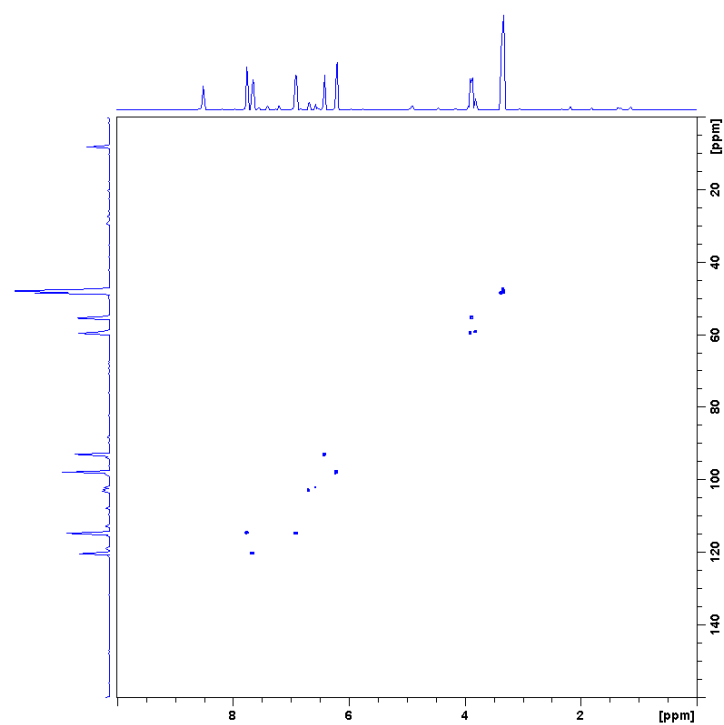HSQC spectrum (methanol-*d*<sub>4</sub>)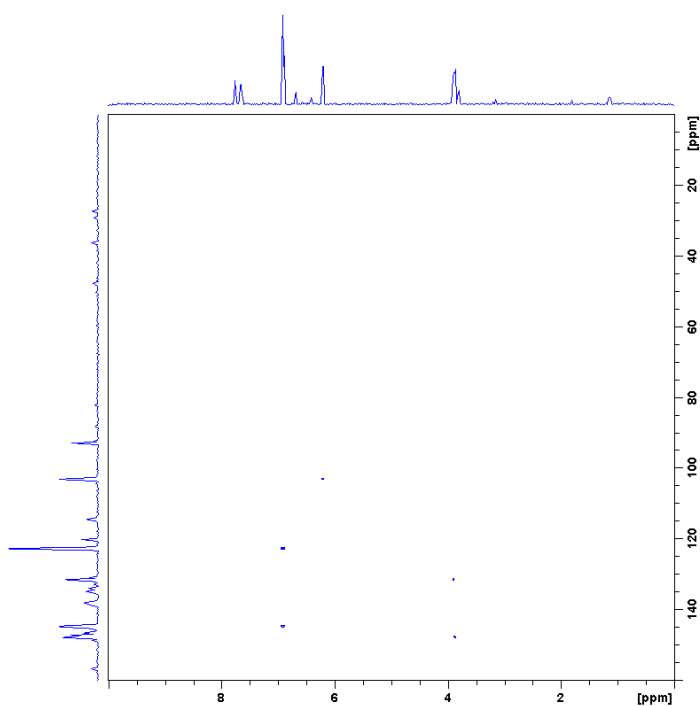HMBC spectrum (methanol-*d*<sub>4</sub>)

**Figure S5.** NMR data of mixture **M-6B** (compounds **II** and **III**).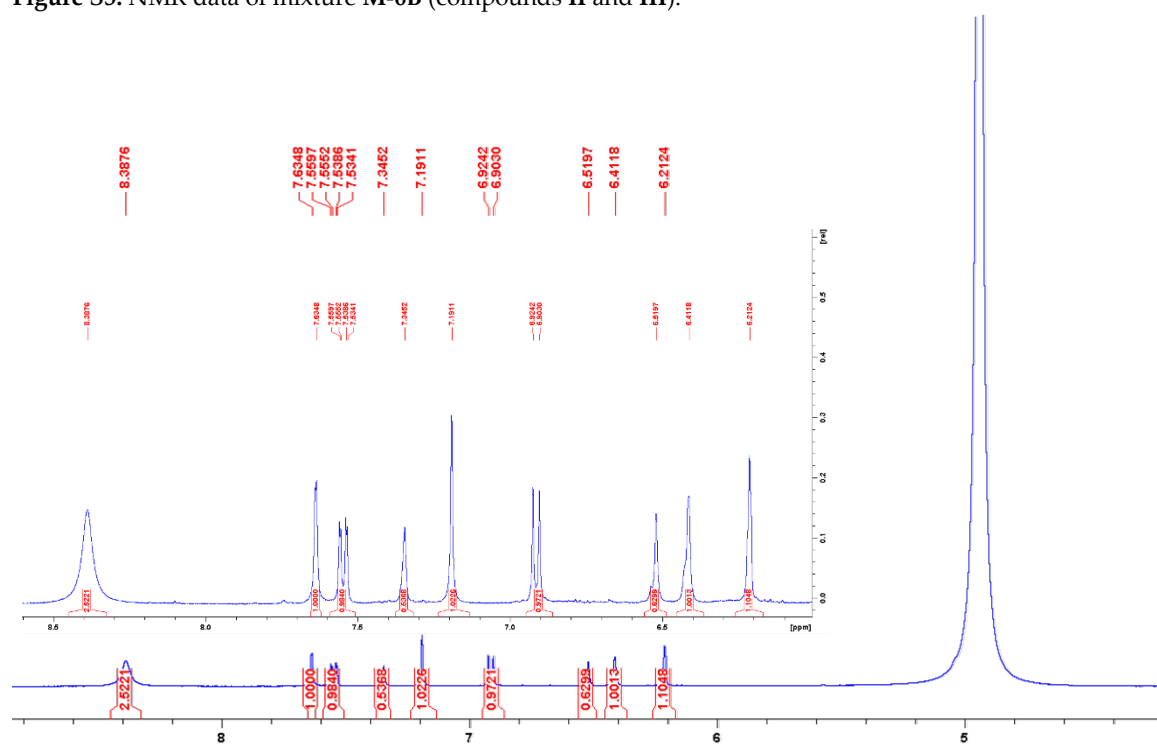

<sup>1</sup>H NMR spectrum (400 MHz, methanol-*d*<sub>4</sub>)

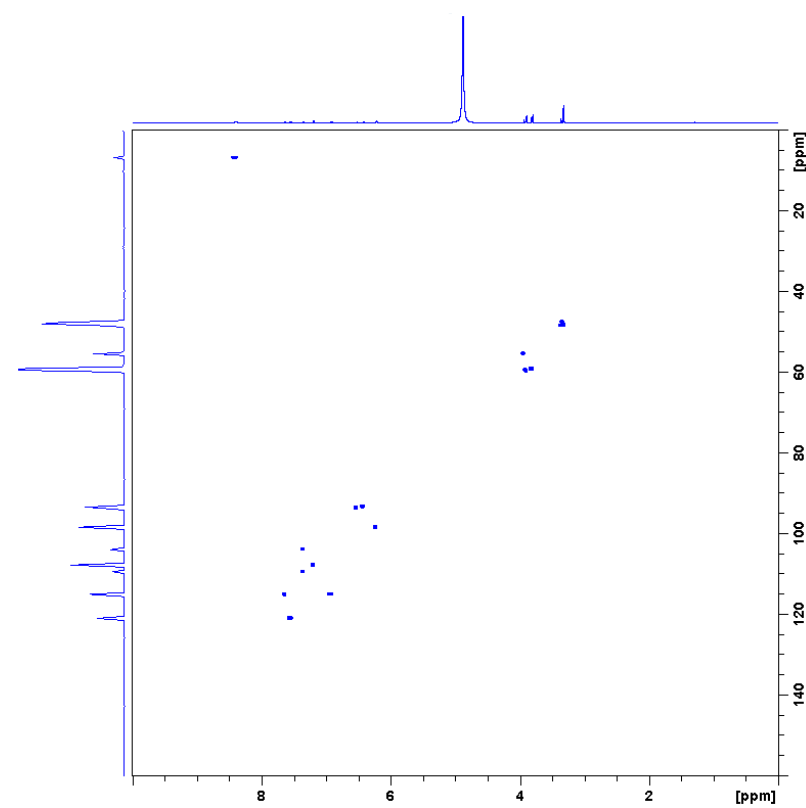

HSQC spectrum (methanol-*d*<sub>4</sub>)

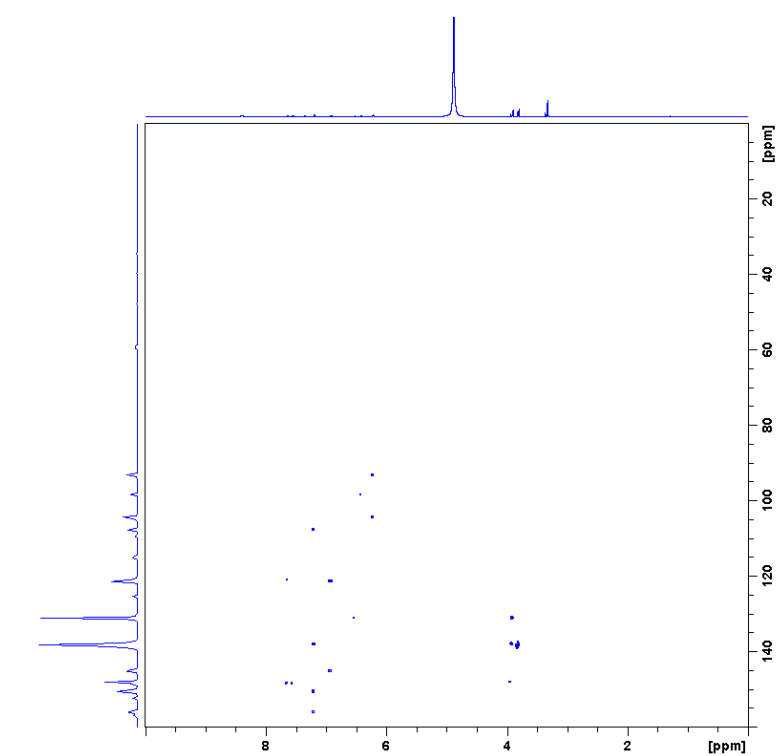HMBC spectrum (methanol- $d_4$ )

Figure S6. NMR data of mixture M-6C (compounds IV and V).

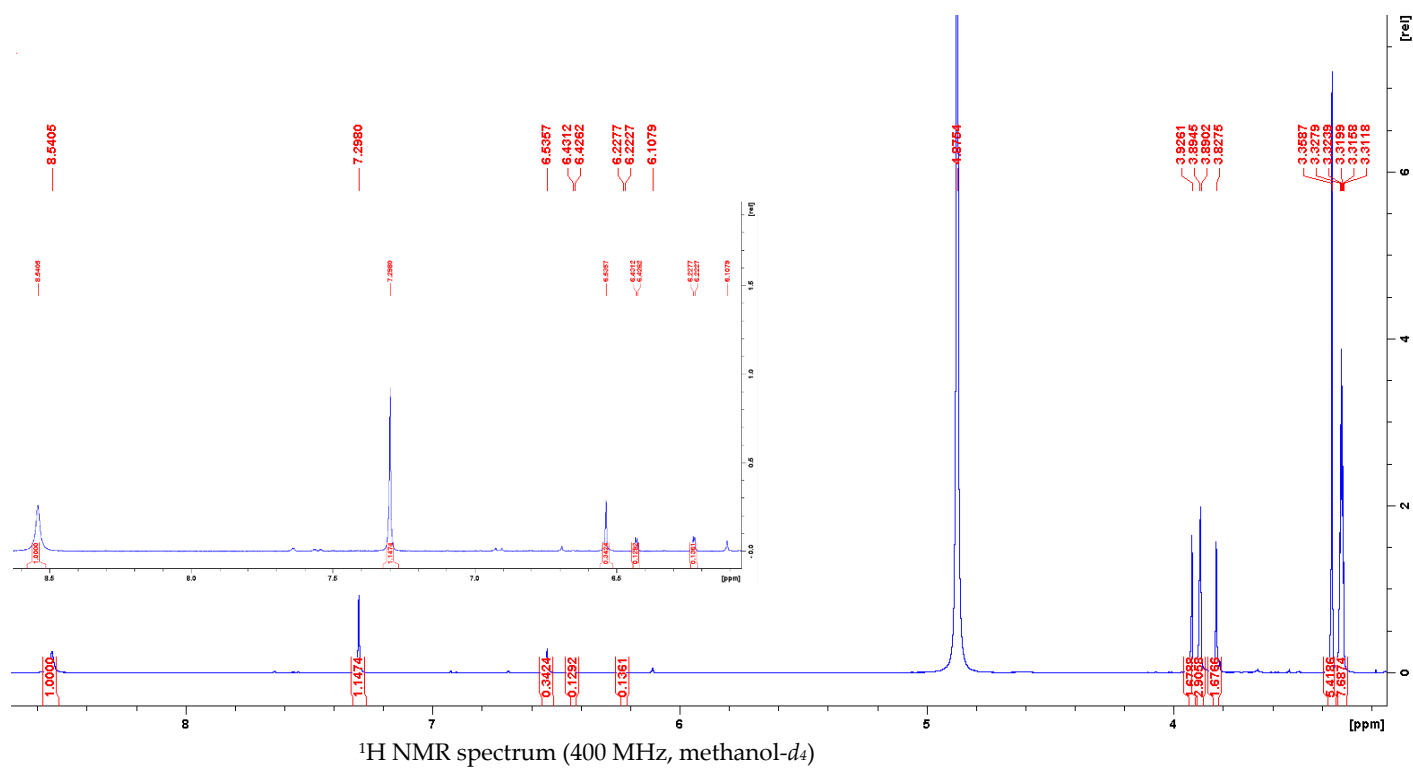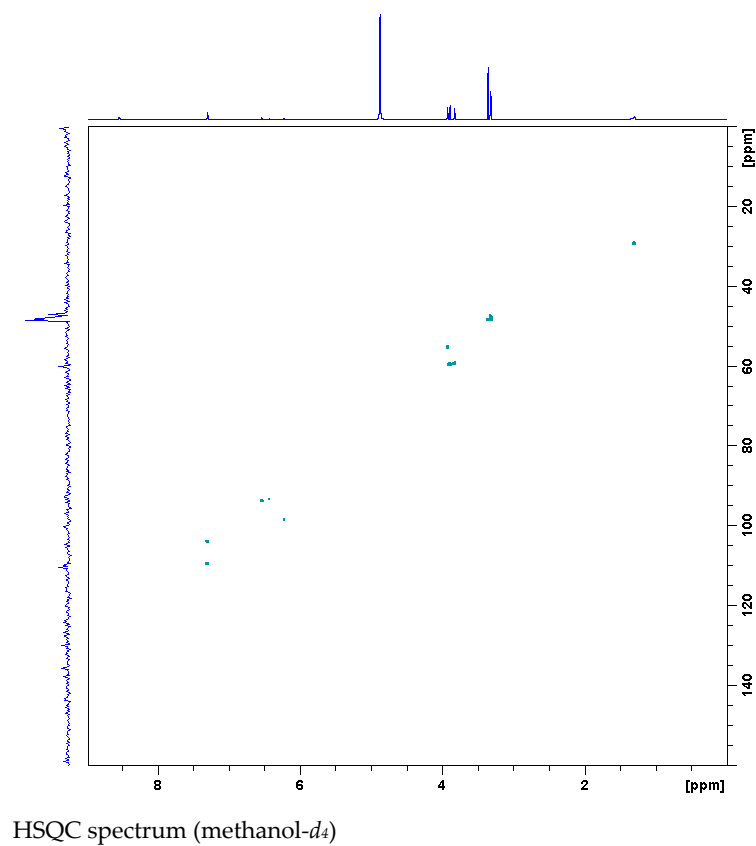

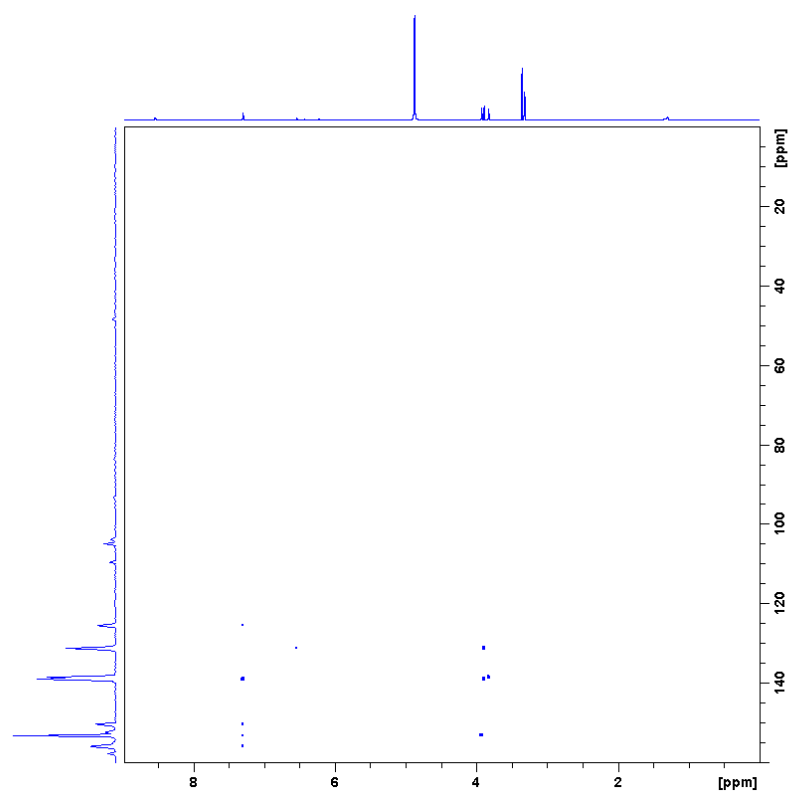HMBC spectrum (methanol-*d*<sub>4</sub>)

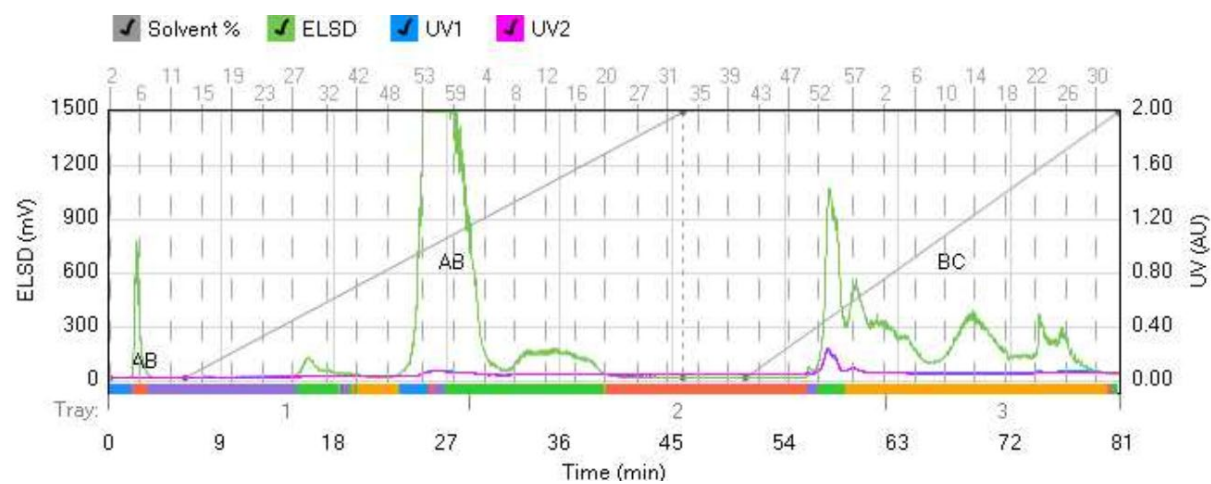

Figure S7. Flash chromatogram of methanol 90% fraction.



**Table S1.** First ten SMART 2.1 results for the major compound of mixture **M-6A**.

| Name                                                                                                                                                                                                                          | Smiles                                                      | Source   | Cosine score               | MW    |
|-------------------------------------------------------------------------------------------------------------------------------------------------------------------------------------------------------------------------------|-------------------------------------------------------------|----------|----------------------------|-------|
| Quercetin                                                                                                                                                                                                                     | <chem>O=c1c(O)c(-c2ccc(O)c(O)c2)oc2cc(O)cc(O)c12</chem>     | ACD_Labs | 0.998693<br>91946663<br>74 | 302.0 |
| Quercetin Dihydrate                                                                                                                                                                                                           | <chem>O.O=c1c(O)c(-c2ccc(O)c(O)c2)oc2cc(O)cc(O)c12</chem>   | ACD_Labs | 0.998693<br>91946663<br>74 | 320.1 |
| Quercetin                                                                                                                                                                                                                     | <chem>C1=CC(=C(C=C1C2=C(C(=O)C3=C(C=C(C=C3O2)O)O)O)O</chem> | ACD_Labs | 0.998693<br>91946663<br>74 | 302.0 |
| ""MLS002153851-01!2-(3,4-dihydroxyphenyl)-3,5,7-trihydroxy-4H-chromen-4-one dihydrate117-39-5""                                                                                                                               | <chem>Oc1cc(O)c2c(=O)c(O)c(oc2c1)c3ccc(O)c(O)c3.O</chem>    | ACD_Labs | 0.998693<br>91946663<br>74 | 320.1 |
| "ReSpect:PT104090 Quercetin Quer 3,3',4',5,7-pentahydroxyflavone Flavin meletin Kvercetin Meletin Quercetol Quercetine Quercitine Quercitin Sophoretin Xanthaurine 3',4',5,7-Tetrahydroxyflavan-3-ol 2-(3,4-Dihydroxyphenyl)" | <chem>C1=CC(=C(C=C1C2=C(C(=O)C3=C(C=C(C=C3O2)O)O)O)O</chem> | ACD_Labs | 0.998693<br>91946663<br>74 | 302.0 |
| "1,3,5,6-Tetrahydroxyxanthen-9-One"                                                                                                                                                                                           | <chem>O=c1c2ccc(O)c(O)c2oc2cc(O)cc(O)c12</chem>             | ACD_Labs | 0.973829<br>86729509<br>11 | 260.0 |
| "1,3,8-Trihydroxy-[1]Benzo-furo[2,3-B]Chromen-11-One"                                                                                                                                                                         | <chem>O=c1c2c(O)cc(O)cc2oc2oc3cc(O)ccc3c12</chem>           | ACD_Labs | 0.968980<br>06475309<br>01 | 284.0 |
| 6-Hydroxyluteolin                                                                                                                                                                                                             | <chem>O=c1cc(-c2ccc(O)c(O)c2)oc2cc(O)c(O)c(O)c12</chem>     | ACD_Labs | 0.958668<br>57401569<br>94 | 302.0 |
| Luteolin                                                                                                                                                                                                                      | <chem>O=c1cc(-c2ccc(O)c(O)c2)oc2cc(O)cc(O)c12</chem>        | ACD_Labs | 0.956004<br>45326754<br>24 | 286.0 |
| Luteolin                                                                                                                                                                                                                      | <chem>O=C1C2=C(C=C(C=C2OC(C3=CC=C(C(O)=C3)O)=C1)O)O</chem>  | ACD_Labs | 0.956004<br>45326754<br>24 | 286.0 |

**Table S2.** First tenSMART 2.1 results for the major compound of mixture **M-6B**.

| Name                                                                     | Smiles                                                           | Source   | Cosine score               | MW    |
|--------------------------------------------------------------------------|------------------------------------------------------------------|----------|----------------------------|-------|
| 3-O-Methylquercetin                                                      | <chem>COc1c(-c2ccc(O)c(O)c2)oc2cc(O)cc(O)c2c1=O</chem>           | ACD_Labs | 0.979444<br>10557808<br>37 | 316.1 |
| 3-O-methylquercetin                                                      | <chem>O=C1C2=C(O)C=C(O)C=C2OC(C3=CC(O)=C(O)C=C3)=C1OC</chem>     | ACD_Labs | 0.979444<br>10557808<br>37 | 316.1 |
| Hispidulin                                                               | <chem>COc1c(O)cc2oc(-c3ccc(O)cc3)cc(=O)c2c1O</chem>              | ACD_Labs | 0.949283<br>34510070<br>88 | 300.1 |
| NCGC00167728-05!5,7-dihydroxy-2-(4-hydroxyphenyl)-6-methoxychromen-4-one | <chem>COC1=C(O)C2=C(OC(=CC2=O)C3=CC=C(O)C=C3)C=C1O</chem>        | ACD_Labs | 0.949283<br>34510070<br>88 | 300.1 |
| 4',7-Dihydroxy-3-Methoxyflavone                                          | <chem>COc1c(-c2ccc(O)cc2)oc2cc(O)ccc2c1=O</chem>                 | ACD_Labs | 0.948671<br>95767113<br>18 | 284.1 |
| 4'-Hydroxywogonin                                                        | <chem>COc1c(O)cc(O)c2c(=O)cc(-c3ccc(O)cc3)oc12</chem>            | ACD_Labs | 0.943533<br>34799565<br>42 | 300.1 |
| 2-(3,4-Dihydroxyphenyl)-5,6,7-Trihydroxy-3-Methoxychromen-4-One          | <chem>COc1c(-c2ccc(O)c(O)c2)oc2cc(O)c(O)c(O)c2c1=O</chem>        | ACD_Labs | 0.942876<br>55866651<br>86 | 332.1 |
| 3-Methoxy-7-Hydroxy-3',4'-Methylenedioxyflavone                          | <chem>COc1c(-c2ccc3c(c2)OCO3)oc2cc(O)ccc2c1=O</chem>             | ACD_Labs | 0.936628<br>53344452<br>61 | 312.1 |
| 4'-methylgossypetin                                                      | <chem>COc1ccc(-c2oc3c(O)c(O)cc(O)c3c(=O)c2O)cc1O</chem>          | Jeol     | 0.936619<br>81783319<br>78 | 332.1 |
| 5-hydroxy-3,8-dimethoxy-3',4':6,7-bismethylenedioxyflavone               | <chem>COc1c(-c2ccc3c(c2)OCO3)oc2c(OC)c3c(c(O)c2c1=O)OC O3</chem> | Jeol     | 0.936484<br>37938095<br>12 | 386.1 |

**Table S3.** First tenSMART 2.1 results for the minor compound of mixture **M-6B**.

| Name                                                                   | Smiles                                                                    | Source   | Cosine score | MW    |
|------------------------------------------------------------------------|---------------------------------------------------------------------------|----------|--------------|-------|
| 5,7,3',5'-Tetrahydroxy-3,4'-Dimethoxyflavone                           | <chem>COc1c(O)cc(-c2oc3cc(O)cc(O)c3c(=O)c2OC)cc1O</chem>                  | ACD_Labs | 0.931111703  | 346.1 |
| garcihombronone D                                                      | <chem>COc1cc2oc3c(OC)c(O)cc(O)c3c(=O)c2cc1O</chem>                        | Jeol     | 0.929443719  | 304.1 |
| 5-hydroxy-3,6,7-trimethoxy-2-(3,4,5-trimethoxyphenyl)-4H-chromen-4-one | <chem>O=C1C2=C(O)C(OC)=C(OC)C=C2OC(C3=CC(OC)=C(C(OC)C(OC)=C3)=C1OC</chem> | ACD_Labs | 0.925304958  | 418.1 |
| 5,6-Dihydroxy-2-(4-Hydroxyphenyl)-7,8-Dimethoxychromen-4-One           | <chem>COc1c(O)c(O)c2c(=O)cc(-c3ccc(O)cc3)oc2c1OC</chem>                   | ACD_Labs | 0.925237879  | 330.1 |
| 4'-methylgossypetin                                                    | <chem>COc1ccc(-c2oc3c(O)c(O)cc(O)c3c(=O)c2O)cc1O</chem>                   | Jeol     | 0.924403668  | 332.1 |
| 1,6,7-Trihydroxy-2,3-Dimethoxyxanthone                                 | <chem>COc1cc2oc3cc(O)c(O)cc3c(=O)c2c(O)c1OC</chem>                        | ACD_Labs | 0.923919173  | 304.1 |
| pyramidamycin B                                                        | <chem>COc1c(O)ccc(C(N)=O)c1O</chem>                                       | ACD_Labs | 0.923246482  | 183.1 |
| pruniflorone O                                                         | <chem>COc1c(O)cc2oc3ccc(O)c(O)c3c(=O)c2c1OC</chem>                        | Jeol     | 0.922376422  | 304.1 |
| Mearnsetin                                                             | <chem>COc1c(O)cc(-c2oc3cc(O)cc(O)c3c(=O)c2O)cc1O</chem>                   | ACD_Labs | 0.915100135  | 332.1 |
| 2-(3,4-Dihydroxyphenyl)-5,6,7-Trihydroxy-3-Methoxychromen-4-One        | <chem>COc1c(-c2ccc(O)c(O)c2)oc2cc(O)c(O)c(O)c2c1=O</chem>                 | ACD_Labs | 0.911989886  | 332.1 |

**Table S4.** First ten SMART 2.1 results for the major compound of mixture **M-6C**.

| Name                                                                           | Smiles                                                                   | Source   | Cosine score | MW    |
|--------------------------------------------------------------------------------|--------------------------------------------------------------------------|----------|--------------|-------|
| 3',5,7-Trihydroxy-3,4',5',6-Tetramethoxyflavone                                | <chem>COc1cc(-c2oc3cc(O)c(OC)c(O)c3c(=O)c2OC)cc(O)c1OC</chem>            | ACD_Labs | 0.966581261  | 390.1 |
| 5,7-dihydroxy-2-(3-hydroxy-4,5-dimethoxyphenyl)-3,6-dimethoxy-4H-chromen-4-one | <chem>OC1=C(C(C(OC)=C(C2=CC(O)=C(OC)C(OC)=C2)O3)=O)C3=CC(O)=C1OC</chem>  | ACD_Labs | 0.966581261  | 390.1 |
| CHEMBL3407503                                                                  | <chem>COc1cc(-c2oc3cc(O)c(OC)c(O)c3c(=O)c2OC)cc(OC)c1OC</chem>           | ACD_Labs | 0.963569815  | 404.1 |
| 5,7-dihydroxy-3,6-dimethoxy-2-(3,4,5-trimethoxyphenyl)-4H-chromen-4-one        | <chem>O=C1C2=C(O)C(OC)=C(O)C=C2OC(C3=CC(OC)=C(OC)C(OC)=C3)=C1OC</chem>   | ACD_Labs | 0.963569815  | 404.1 |
| garcihombronone D                                                              | <chem>COc1cc2oc3c(OC)c(O)cc(O)c3c(=O)c2cc1O</chem>                       | Jeol     | 0.959102406  | 304.1 |
| NCGC00385661-0113,5,7,8-tetramethoxy-2-(3,4,5-trimethoxyphenyl)chromen-4-one   | <chem>COC1=CC(=CC(OC)=C1OC)C2=C(OC)C(=O)C3=C(OC)C=C(OC)C(OC)=C3O2</chem> | ACD_Labs | 0.953509138  | 432.1 |
| Combretol                                                                      | <chem>COc1cc(O)c2c(=O)c(OC)c(-c3cc(OC)c(OC)c(OC)c3)oc2c1</chem>          | ACD_Labs | 0.949210342  | 388.1 |
| Brickellin                                                                     | <chem>COc1cc(O)c(-c2oc3cc(OC)c(OC)c(O)c3c(=O)c2OC)cc1OC</chem>           | ACD_Labs | 0.947090565  | 404.1 |
| 5,7-Dihydroxy-3,3',4',6-Tetramethoxyflavone                                    | <chem>COc1ccc(-c2oc3cc(O)c(OC)c(O)c3c(=O)c2OC)cc1OC</chem>               | ACD_Labs | 0.94702507   | 374.1 |
| 2-(3,4-dimethoxyphenyl)-5,7-dihydroxy-3,6-dimethoxy-4H-chromen-4-one           | <chem>O=C1C2=C(O)C(OC)=C(O)C=C2OC(C3=CC=C(OC)C(OC)=C3)=C1OC</chem>       | ACD_Labs | 0.94702507   | 374.1 |

**Table S5.** First ten SMART 2.1 results for the minor compound of mixture **M-6C**.

| Name                                                                                     | Smiles                                                             | Source   | Cosine score | MW    |
|------------------------------------------------------------------------------------------|--------------------------------------------------------------------|----------|--------------|-------|
| 5,7-dihydroxy-3',4',5'-trimethoxyflavone                                                 | <chem>COc1cc(-c2cc(=O)c3c(O)cc(O)cc3o2)cc(OC)c1OC</chem>           | Jeol     | 0.980856037  | 344.1 |
| Pmf                                                                                      | <chem>COc1cc(OC)c2c(=O)cc(-c3cc(OC)c(OC)c(OC)c3)oc2c1</chem>       | ACD_Labs | 0.969987497  | 372.1 |
| Corymbosin                                                                               | <chem>COc1cc(O)c2c(=O)cc(-c3cc(OC)c(OC)c(OC)c3)oc2c1</chem>        | ACD_Labs | 0.968526357  | 358.1 |
| Chrysosplenol G                                                                          | <chem>COc1cc(O)c2c(=O)c(OC)c(-c3cc(O)c(OC)cc3OC)oc2c1</chem>       | ACD_Labs | 0.963094821  | 374.1 |
| Lethedocin                                                                               | <chem>COc1cc(O)c2c(=O)cc(-c3cc(O)c(OC)c(OC)c3)oc2c1</chem>         | ACD_Labs | 0.961915005  | 344.1 |
| Myricetin 3,3',4'-Trimethylether                                                         | <chem>COc1cc(-c2oc3cc(O)cc(O)c3c(=O)c2OC)cc(O)c1OC</chem>          | ACD_Labs | 0.946998833  | 360.1 |
| 5-hydroxy-2-(3-hydroxy-4,5-dimethoxyphenyl)-3,7-dimethoxy-4H-chromen-4-one               | <chem>O=C1C2=C(O)C=C(OC)C=C2OC(C3=CC(O)=C(OC)C(OC)=C3)=C1OC</chem> | ACD_Labs | 0.944809424  | 374.1 |
| 5-Hydroxy-2-(4-Hydroxy-3,5-Dimethoxyphenyl)-6,7-Dimethoxychromen-4-One                   | <chem>COc1cc(-c2cc(=O)c3c(O)c(OC)c(OC)cc3o2)cc(OC)c1O</chem>       | ACD_Labs | 0.943506297  | 374.1 |
| "MLS000863593-01!5-hydroxy-2-(4-hydroxy-3,5-dimethoxyphenyl)-6,7-dimethoxychromen-4-one" | <chem>COc1cc(cc(OC)c1O)c2cc(=O)c3c(O)c(OC)c(OC)c3o2</chem>         | ACD_Labs | 0.943506297  | 374.1 |
| 5,7-Dihydroxy-3',4',5'-Trimethoxyflavone                                                 | <chem>COc1cc(-c2cc(=O)c3c(O)cc(O)cc3o2)cc(OC)c1OC</chem>           | ACD_Labs | 0.943118601  | 344.1 |

## References

1. Morreel, K.; Dima, O.; Kim, H.; Lu, F.; Niculaes, C.; Vanholme, R.; Dauwe, R.; Goeminne, G.; Inzé, D.; Messens, E.; et al. Mass Spectrometry-Based Sequencing of Lignin Oligomers. *Plant Physiol.* **2010**, *153*, 1464–1478, doi:10.1104/pp.110.156489.
2. Morreel, K.; Kim, H.; Lu, F.; Dima, O.; Akiyama, T.; Vanholme, R.; Niculaes, C.; Goeminne, G.; Inze, D.; Messens, E.; et al. Mass Spectrometry-Based Fragmentation as an Identification Tool in Lignomics. *Anal. Chem.* **2010**, *82*, 8095–8105, doi:10.1021/ac100968g.
